# Supplementary material
Source: PubMed Central journal article supplement (PMC10841524)
Supplement: NIHMS1935413-supplement-MMC1.pdf [file NIHMS1935413-supplement-MMC1.pdf]

**Neuron, Volume 112**

**Supplemental information**

**Mapping of neuronal and glial primary  
cilia contactome and connectome  
in the human cerebral cortex**

**Jun Yao Wu, Su-Ji Cho, Katherine Descant, Peter H. Li, Alexander Shapson-Coe, Michal Januszewski, Daniel R. Berger, Cailyn Meyer, Cristine Casingal, Ariba Huda, Jiaqi Liu, Tina Ghashghaei, Mikayla Brenman, Michelle Jiang, Joseph Scarborough, Art Pope, Viren Jain, Jason L. Stein, Jiami Guo, Ryohei Yasuda, Jeff W. Lichtman, and E.S. Anton**

## Supplemental Information

### Supplemental Figures

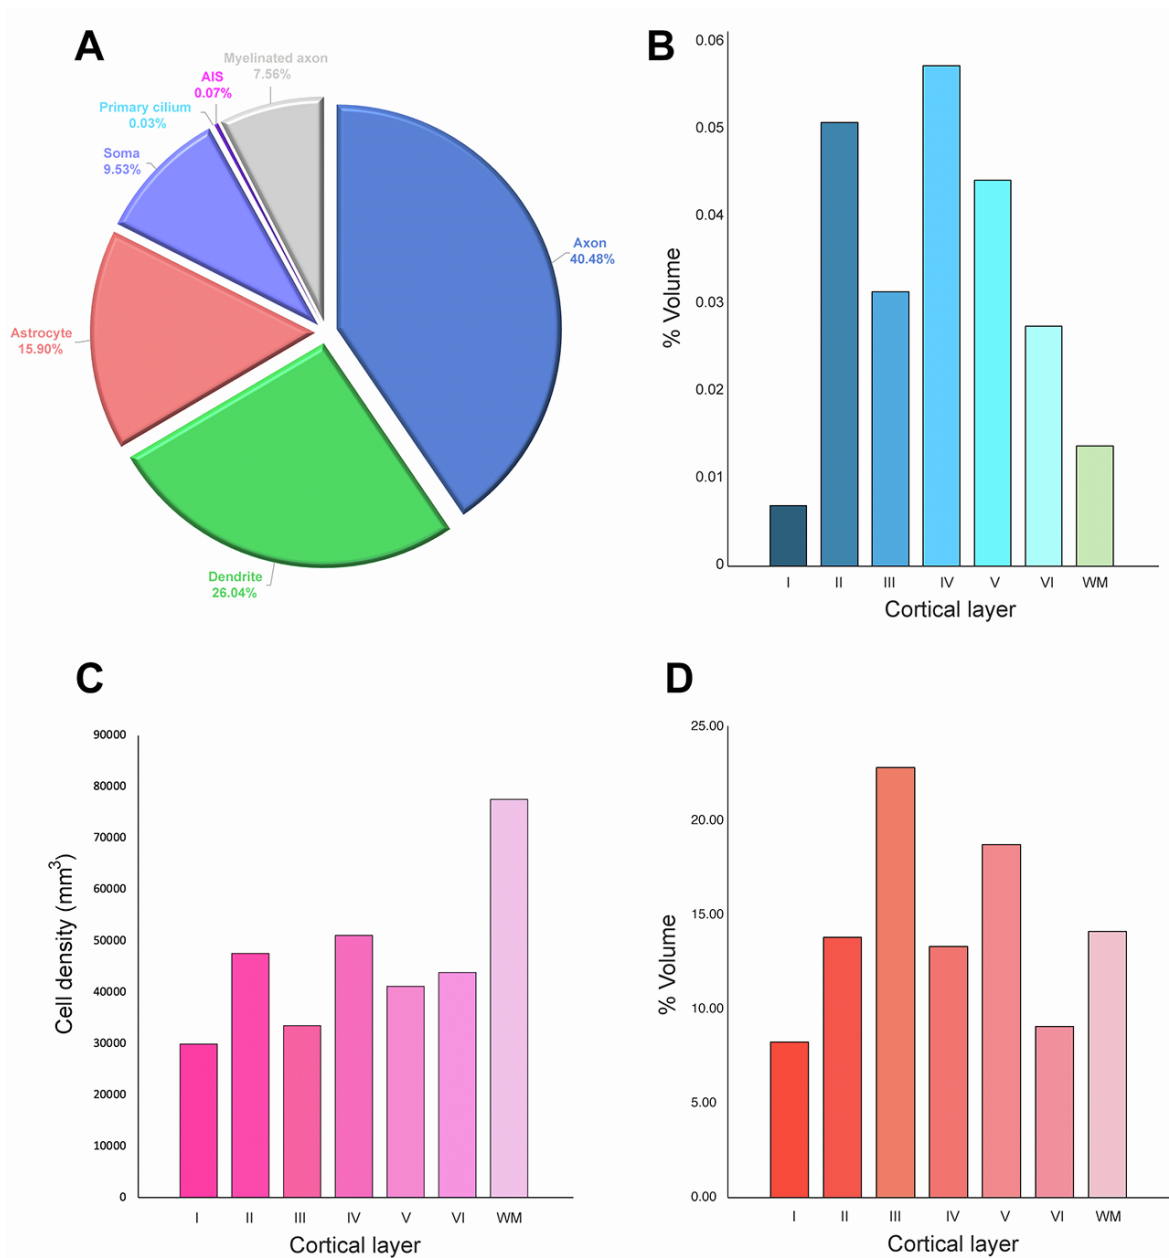

**Supplemental Figure 1. Cortical volume occupied by primary cilia** (Related to Figures 1, 2, and 3). Relative volume occupied by the primary cilia, other cell domains, and cell types in the cerebral cortex (A; modified from Shapson-Coe et al<sup>36</sup>). Layer-specific volume occupancy of primary cilia (B). Relative cellular density (C) and volume (D) of each layer for comparison.

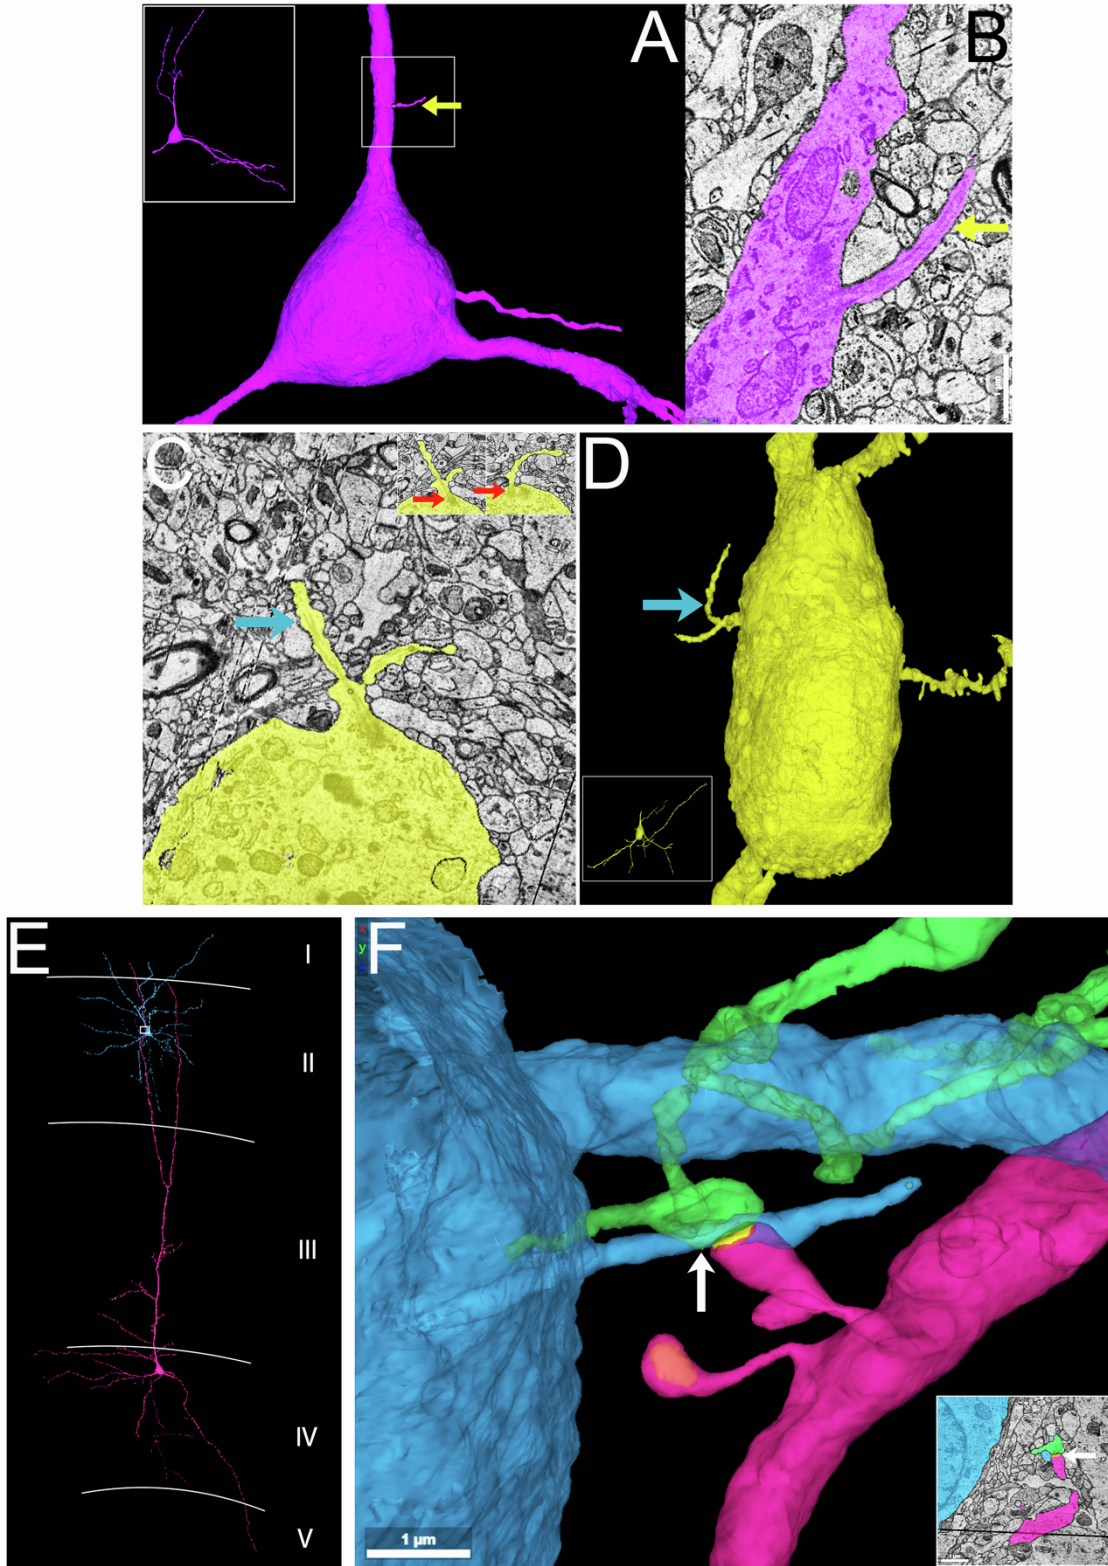

**Supplemental Figure 2. Atypical cortical neuronal cilia** (Related to Figures 2 and 3).

A cilium extending from the dendrite of a layer 5 interneuron (arrow, A-B). Inset in panel

A shows the entire neuron. Panel B is an EM section of the boxed area in panel A. (C-D) An example of a neuron with what appears to be two cilia. In this layer 4 interneuron, two ciliary axonemes (blue arrow, C, D) appear to extend from two basal bodies (red arrow, C). Inset in panel D shows the entire neuron. (E-F) Atypical long-distance contact of a neuronal cilium. A layer 4 projection neuronal dendrite contacts a layer 2 projection neuronal primary cilium (E). The contacting dendrite (pink) and the neuronal cilium (blue) are components of an excitatory synapse (yellow [arrow],F). Inset (F) shows the EM micrograph of this contact. The synapse (green [pre]/pink [post]; arrow) and the cilium (blue) are highlighted.

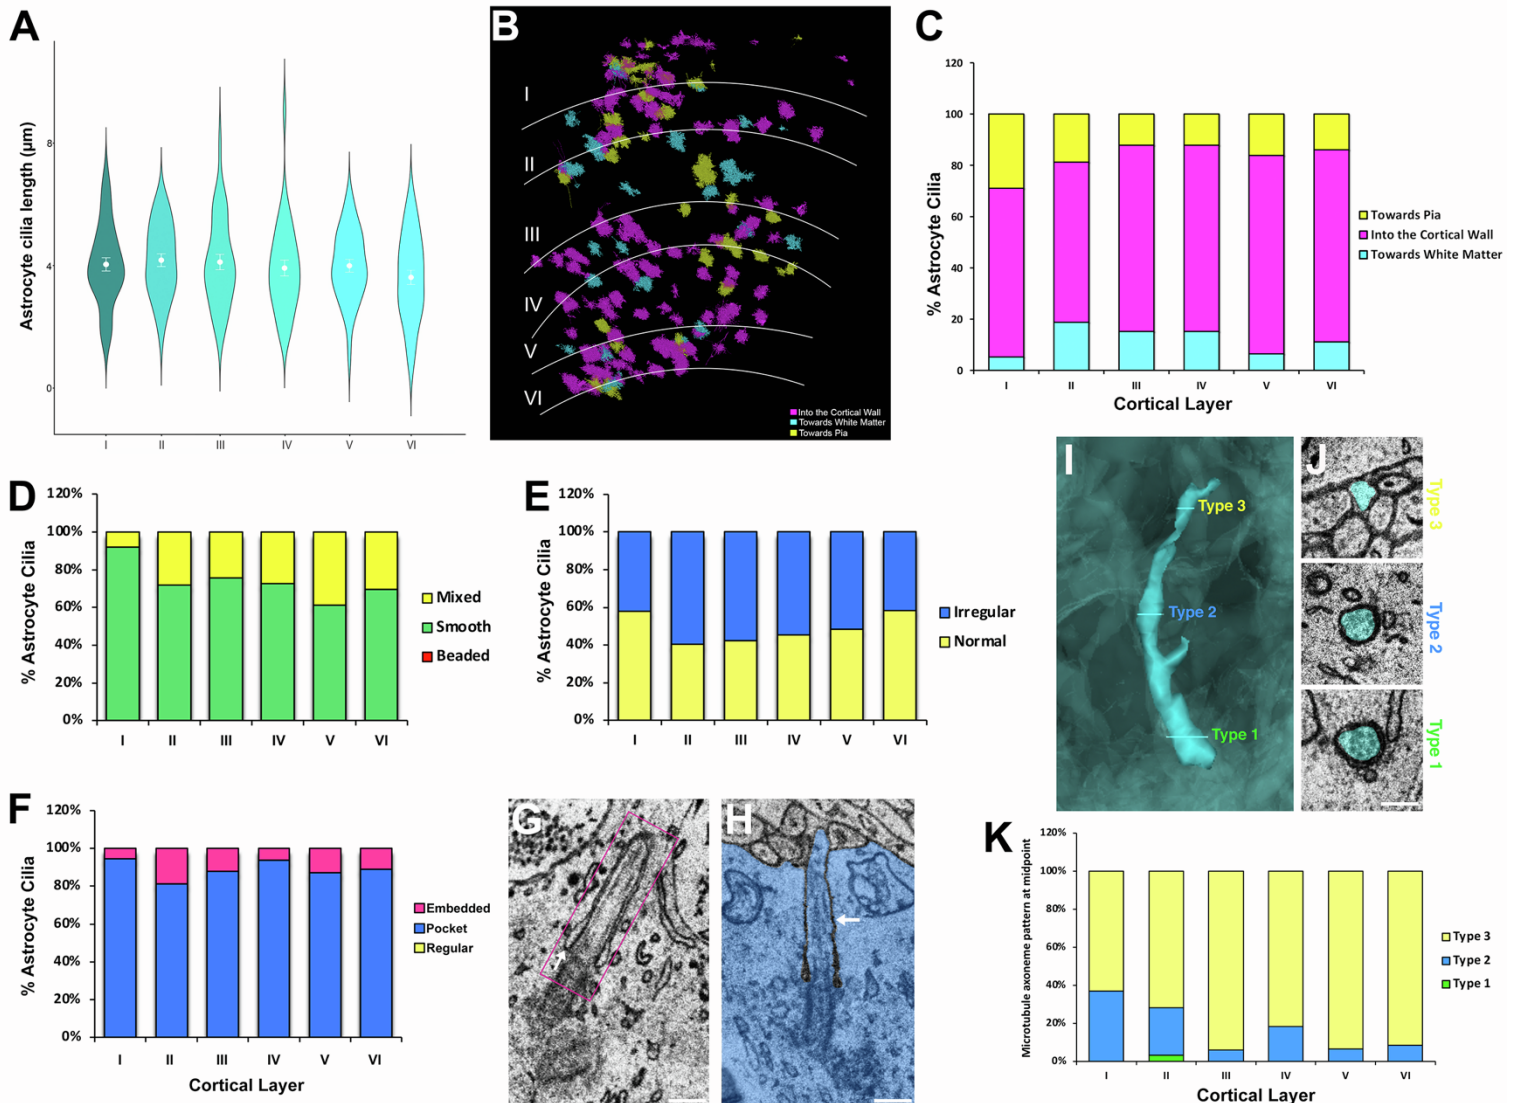

### Supplemental Figure 3. The organization and structure of astrocyte primary cilia

(Related to Figures 4 and 7). (A) Quantification of the average length of astrocyte primary cilia from layers I and VI. Data shown are mean  $\pm$  SEM. One-way ANOVA (cilia length):  $P > 0.05$ .

(B-C) Astrocyte primary cilia orientation. (B) The layer location of astrocytes with different cilia orientations. Cells are highlighted in colors corresponding to different cilia orientation. (C) Quantification of astrocyte primary cilia orientation (i.e., towards the pial surface, white matter, or into the cortical wall). Astrocytes from different cortical layers (I-VI) were quantified. One-way ANOVA (orientation):  $F_{2, 15} = 147$ ,  $p = 1.4E^{-11}$ .

(D) Quantification of astrocyte cilia shape. I-VI, cortical layers. One-way ANOVA (cilia type):  $F_{2,10} = 79.7$ ,  $p = 0.00029$ .

(E) Quantification of basal body organization (normal or irregular) of astrocyte cilia. I-VI, cortical layers. One-way ANOVA (basal body organization):  $P > 0.05$ .

(F-H) Organization of astrocyte primary cilia. Quantification of astrocyte ciliary axoneme fully embedded within a ciliary sheath inside the soma (F, G [box]) and cilia extending from a ciliary pocket at the base (F, H [arrow]). The axoneme of the astrocyte primary cilium in panel G (box) does not extend outside the cell surface. Arrow (G) indicates ciliary sheath. (Also see *Supplemental Movie 5*). I-VI, cortical layers. One-way ANOVA (ciliary organization):  $F_{2,10} = 543.3$ ,  $p = 6.3E^{-11}$ . Scale bar:  $0.35\mu\text{m}$  (G-H).

(I-K) Changing dynamics of axoneme MT core of astrocyte primary cilia. Quantification of the extension of MT filaments within astrocyte cilia from different layers. (I-J) Sample images of cross sections from the base, middle, and tip of an astrocyte cilium. Cross sections containing 9-8, 7-4, and 3 or fewer MT doublet filaments are classified as type 1, 2, and 3, respectively. (K) Quantification of the MT type at the midpoint of astrocyte cilia from different layers. I-VI, cortical layers. Data shown are mean  $\pm$  SEM. One-way ANOVA:  $F_{2,10[\text{MT organization-midpoint}]} = 69.6$ ,  $p = 1.3E^{-6}$ .

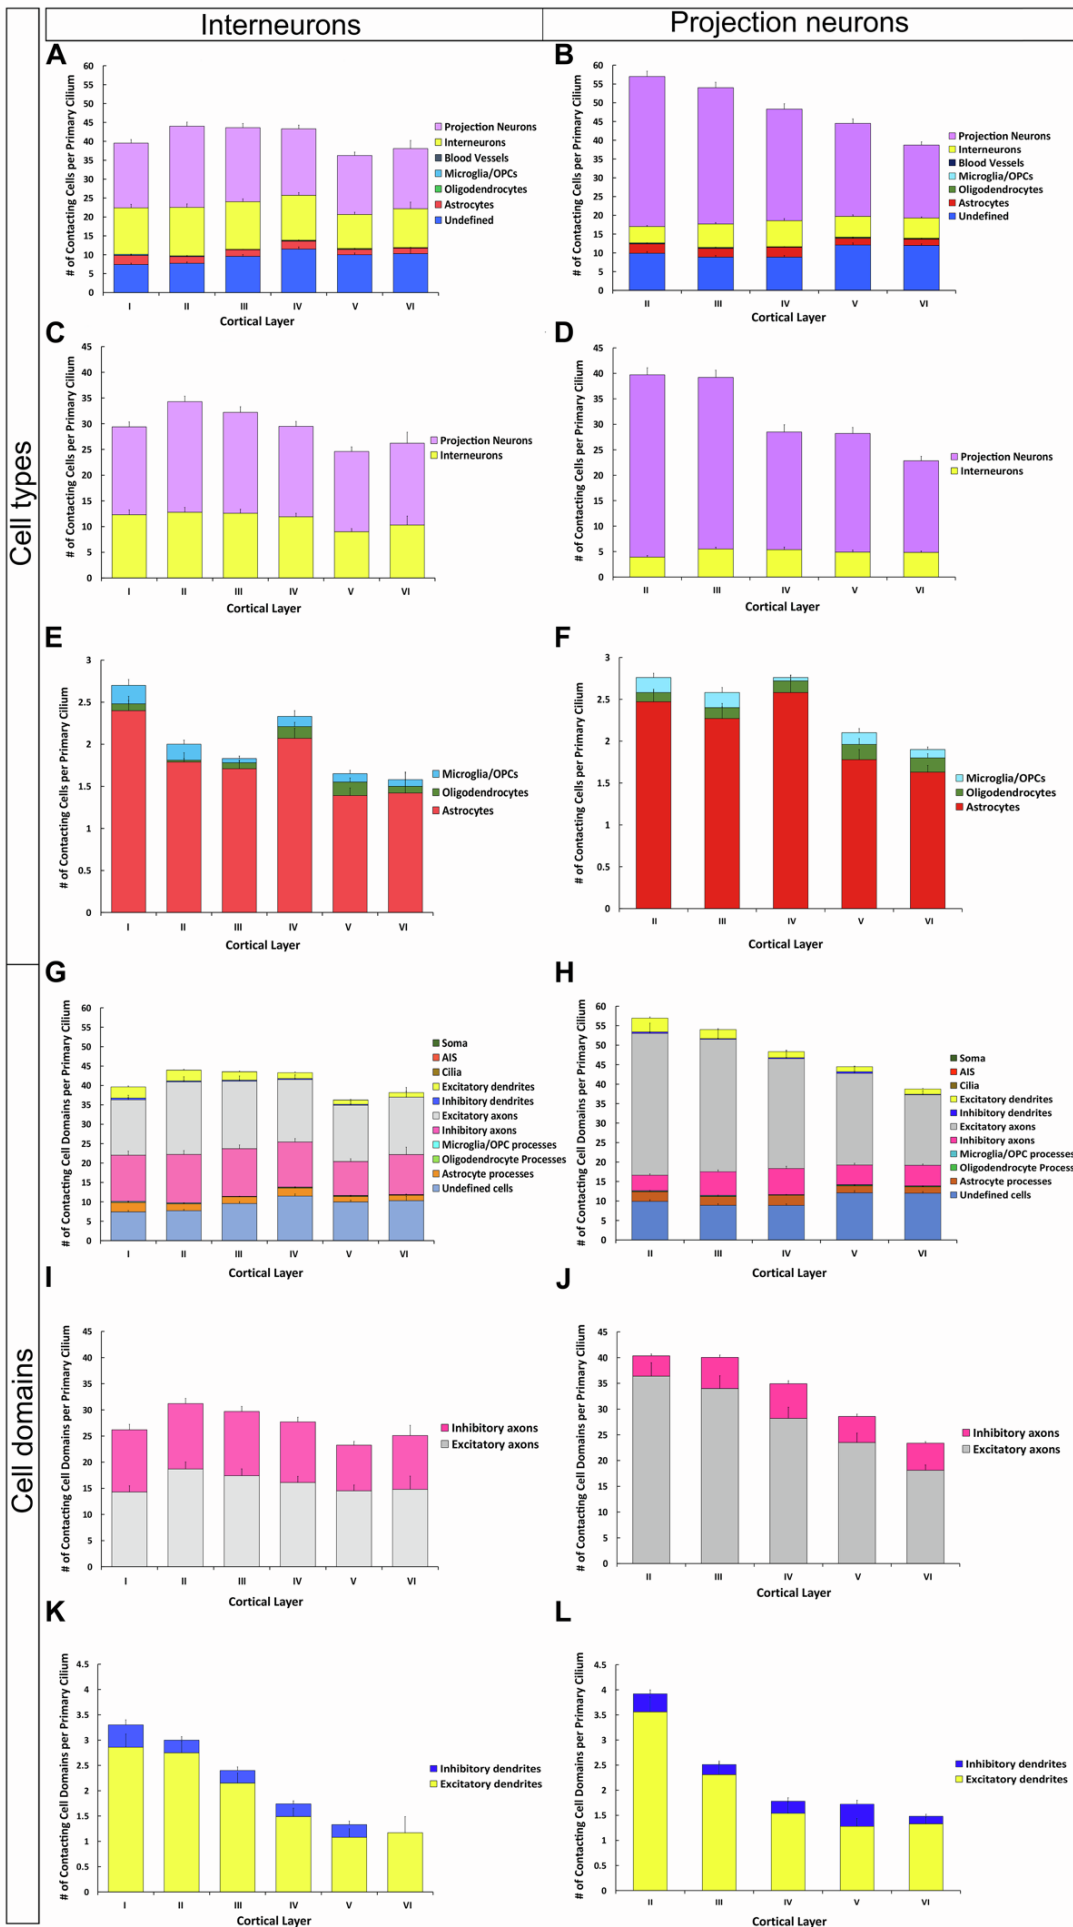

**Supplemental Figure 4. Quantification of cortical neuronal primary cilia contactome** (Related to Figures 5 and 6). Cell types (A-B) and different cell domains (G-H) contacting the primary cilium of different cortical interneurons (A, C, E, G, I, K) and projection neurons (B, D, F, H, J, L) were quantified. Panels C-D and E-F illustrate the differences in cilia-contacting neuronal and glial types, respectively. Panels I-J and K-L illustrate the differences in cilia-contacting axonal and dendrite types, respectively. I-VI, cortical layers. Data shown are mean $\pm$ SEM. Two-way ANOVA (cell types, IN vs PN): Layer II,  $p= 0.01$ ; Layer III,  $p= 0.0012$ ; Layer IV,  $p= 0.006$ ; Layer V,  $p= 0.002$ ; Layer VI,  $p= 0.0004$ . Two-way ANOVA (cell domains, IN vs PN): Layer II,  $p= 0.002$ ; Layer III,  $p= 0.0016$ ; Layer IV,  $p= 3.5E^{-4}$ ; Layer V,  $p= 5.5E^{-5}$ ; Layer VI,  $p= 2.4E^{-6}$ .



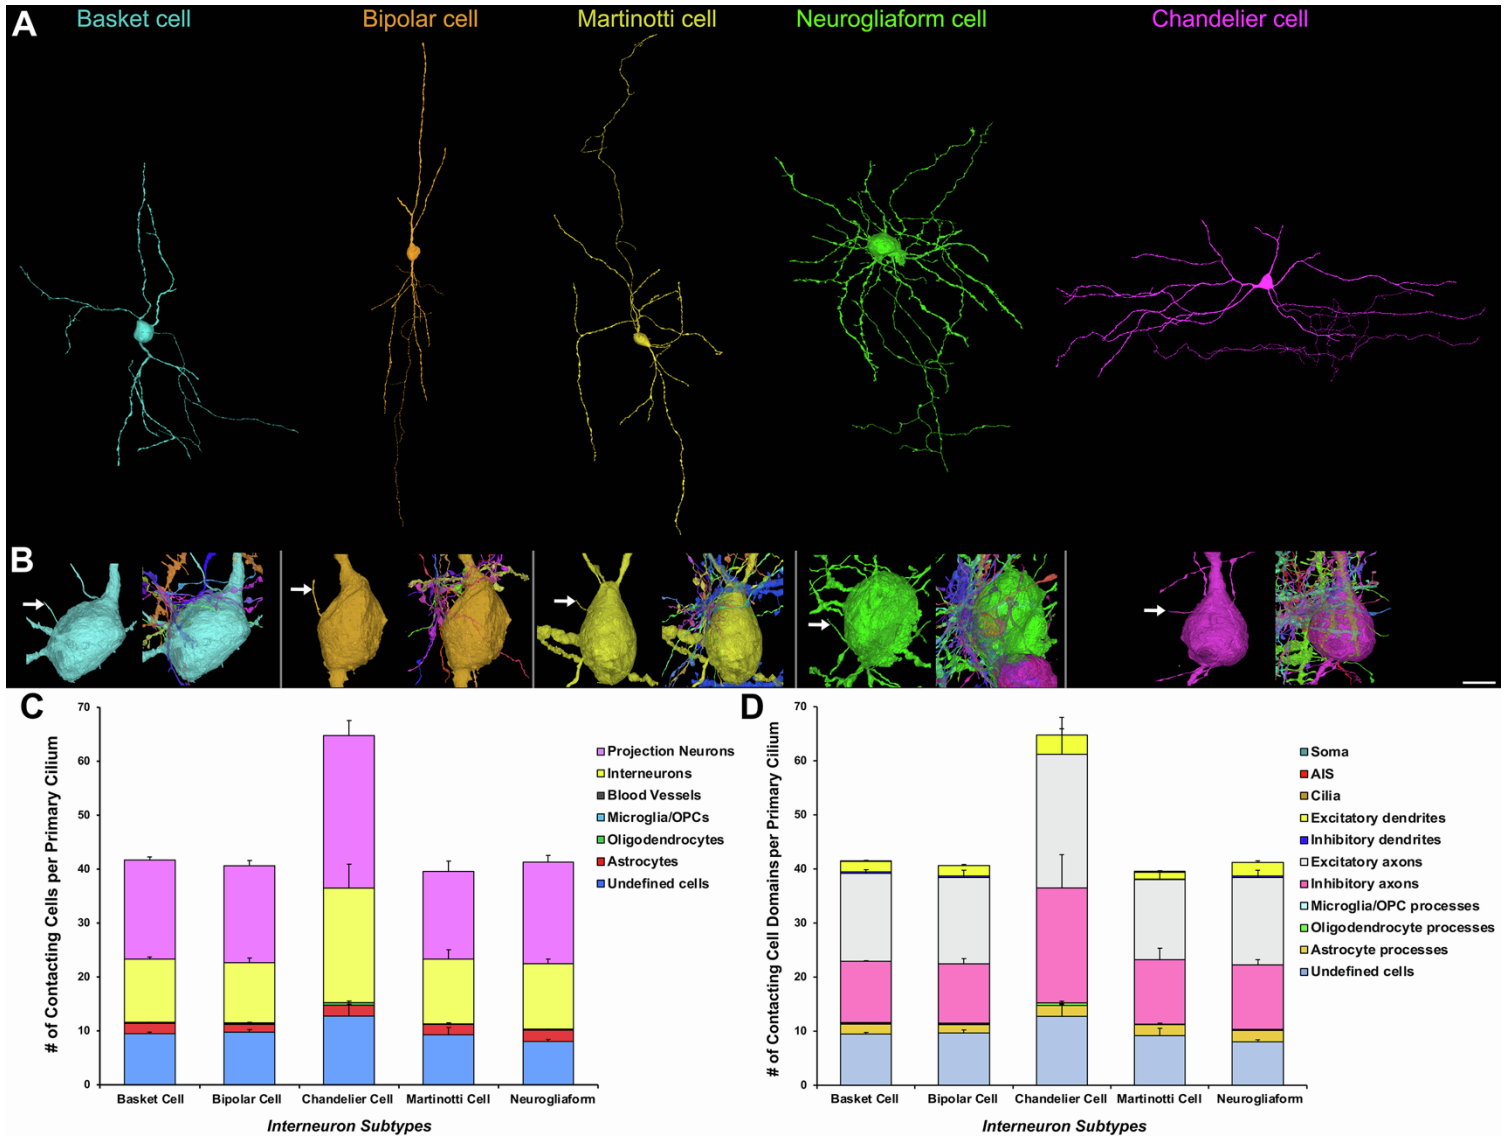

**Supplemental Figure 5. Quantification of interneuronal primary cilia contactome and organization** (Related to Figure 5). (A) Different types of cortical interneurons. (B) Primary cilium of each of these neurons (arrow, right panels) and all the cells contacting them (left panels, B). Cell types (C) and different cell domains (D) contacting the primary cilium of different subtypes of cortical interneurons were quantified. Data shown are mean $\pm$ SEM. Two-way ANOVA (cell types):  $F_{4,199[\text{cell types}]} = 3.041$ ,  $p = 0.018$ , post-hoc  $p_{[\text{projection neurons, Chandelier cells versus other IN cell types}]} < 0.05$ . Two-way ANOVA (cell domains):  $F_{4,228[\text{cell domains}]} = 2.591$ ,  $p = 0.037$ , post-hoc  $p_{[\text{excitatory axons, Chandelier cells versus other IN cell types}]} < 0.05$ . Scale bar: A, 60 $\mu$ m; B, 15 $\mu$ m.

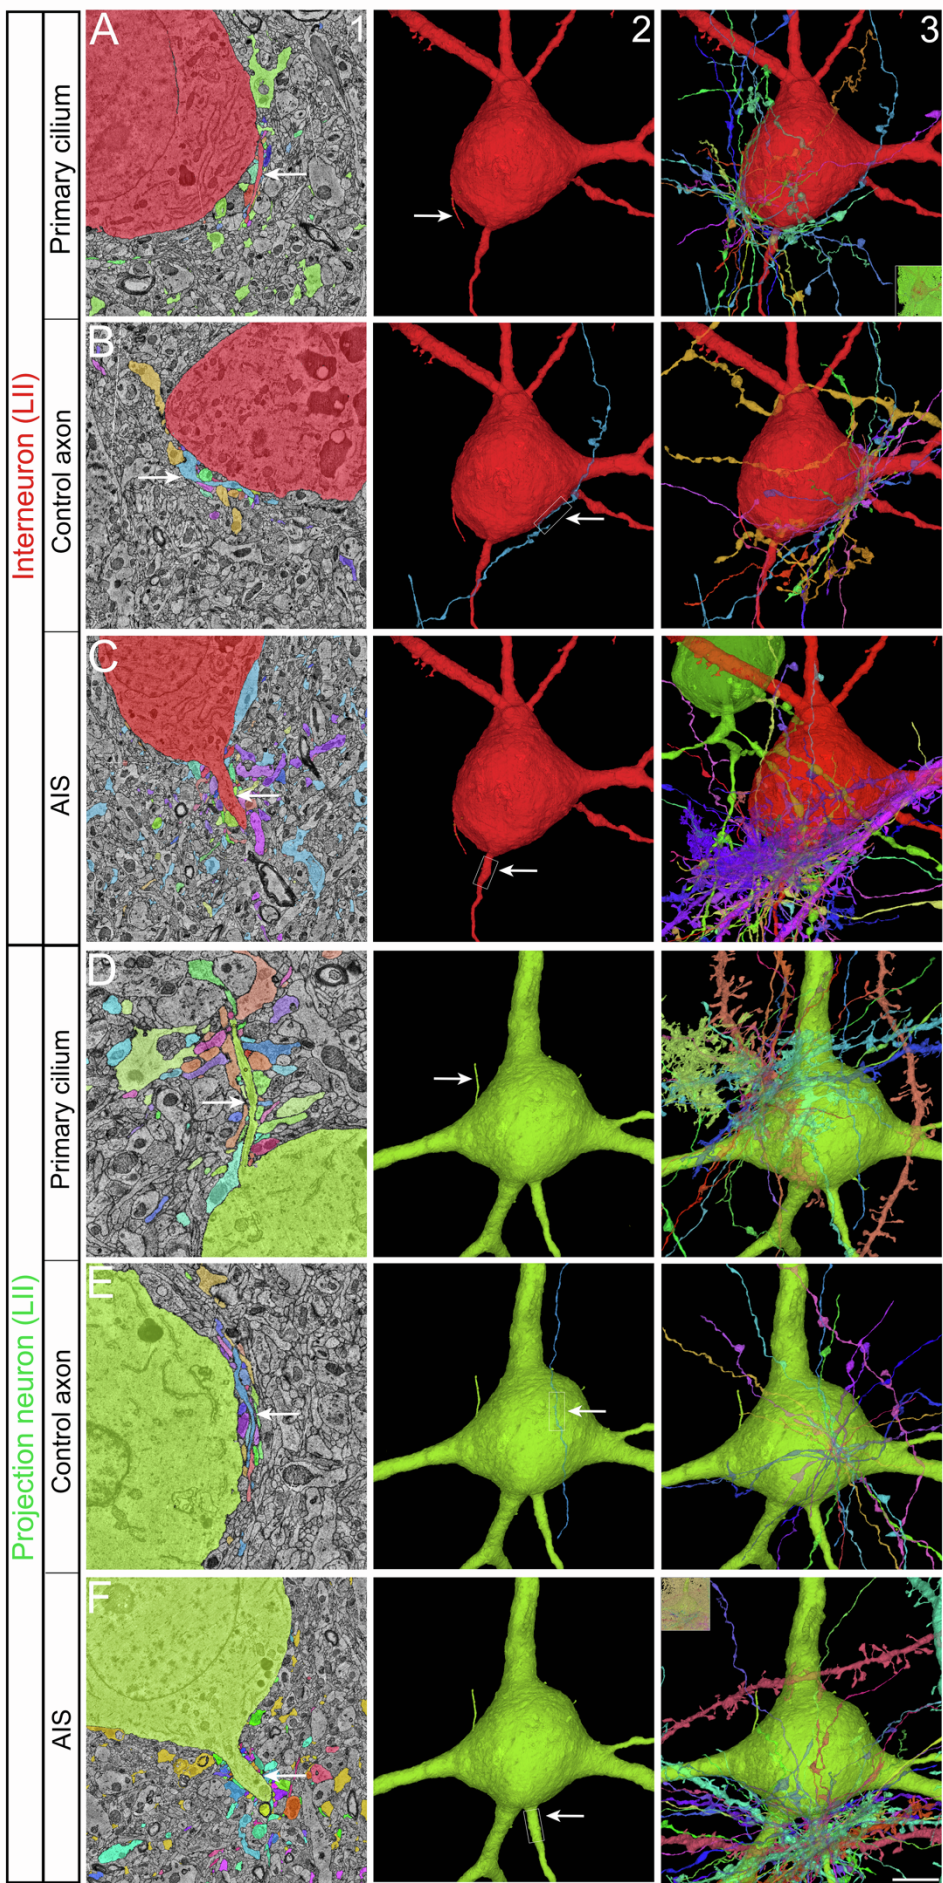

**Supplemental Figure 6. Control axon segment and AIS contactome** (Related to Figures 5, 6, and 7). Primary cilium of a cortical interneuron (arrow, columns 1 and 2; A) and all the axons and dendrites of other neurons as well as the non-neural cells contacting it (column 3; A). Column 1 shows electron micrograph of the relevant cilium (arrow) and its contacting cells. Control axon segment (arrow, columns 1 and 2; B) and all the cells contacting it (column 3; B) as illustrated for the cilium. AIS (arrow, columns 1 and 2; C) and all the cells contacting it (columns 3; C) as illustrated for the cilium. Connectome of a projection neuronal cilium, control axon segment, and AIS are similarly illustrated in rows D, E, and F. Control axon segments and AIS are of the same length and phenotype (excitatory or inhibitory) as the relevant primary cilium. Insets (Column 3, A and F) show astrocytes, which were removed for clarity from the larger image. Scale bar: 2.6 $\mu$ m (column1); 6.6 $\mu$ m (columns 2-3).

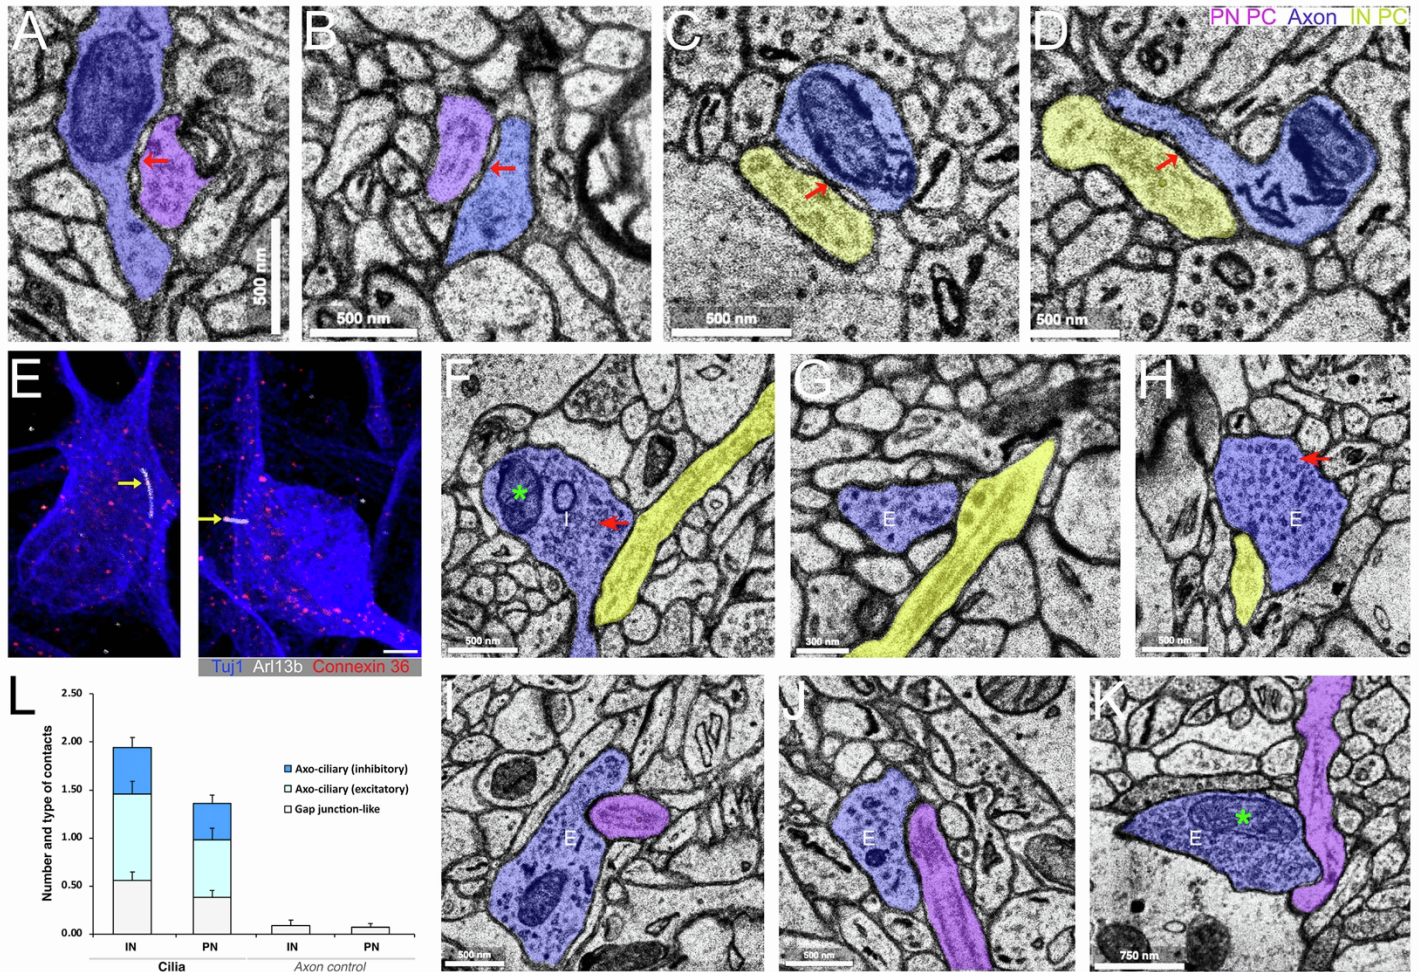

**Supplemental Figure 7. Diversity of neuronal primary cilia-axon contacts** (Related to Figures 5, 6, 8, and S4). (A-D). Gap junction-like neuronal primary cilia-axon contacts. Neuronal primary cilia can make gap junction-like contacts with axonal domains (arrow, A-D). Arrows indicate electron dense intercellular gap junction like contacts. (E) Expression of neuronal GAP junction hemichannel, connexin-36, in human cortical neuronal cilia (arrow). (F-K) Axo-ciliary contacts. Neuronal primary cilia make membrane contacts with axonal domains that are enriched in synaptic vesicles (arrows, F-K). Some cilia-contacting axonal domains also contain mitochondria (asterisk, F, K). Axonal type (excitatory [E] and inhibitory [I]) is indicated in each panel. (L) Quantification of different types of neuronal cilia-axon contacts. Data shown are mean±SEM. Student's t-test (axo-ciliary contacts or gap junction-like contacts):  $IN_{\text{cilia}} \text{ vs } IN_{\text{axon control}}, P < 0.05$ ;  $PN_{\text{cilia}} \text{ vs } PN_{\text{axon control}}, P < 0.05$ . Yellow and purple indicate primary cilia from inhibitory and excitatory neurons, respectively. IN PC, interneuron primary cilia; PN PC, projection neuron primary

cilia. Scale bar: 3.125 $\mu$ m (E). Neuroglancer links to images in A-D and F-K are as follows- [A](#), [B](#), [C](#), [D](#), [E](#), [G](#), [H](#), [I](#), [J](#), [K](#).

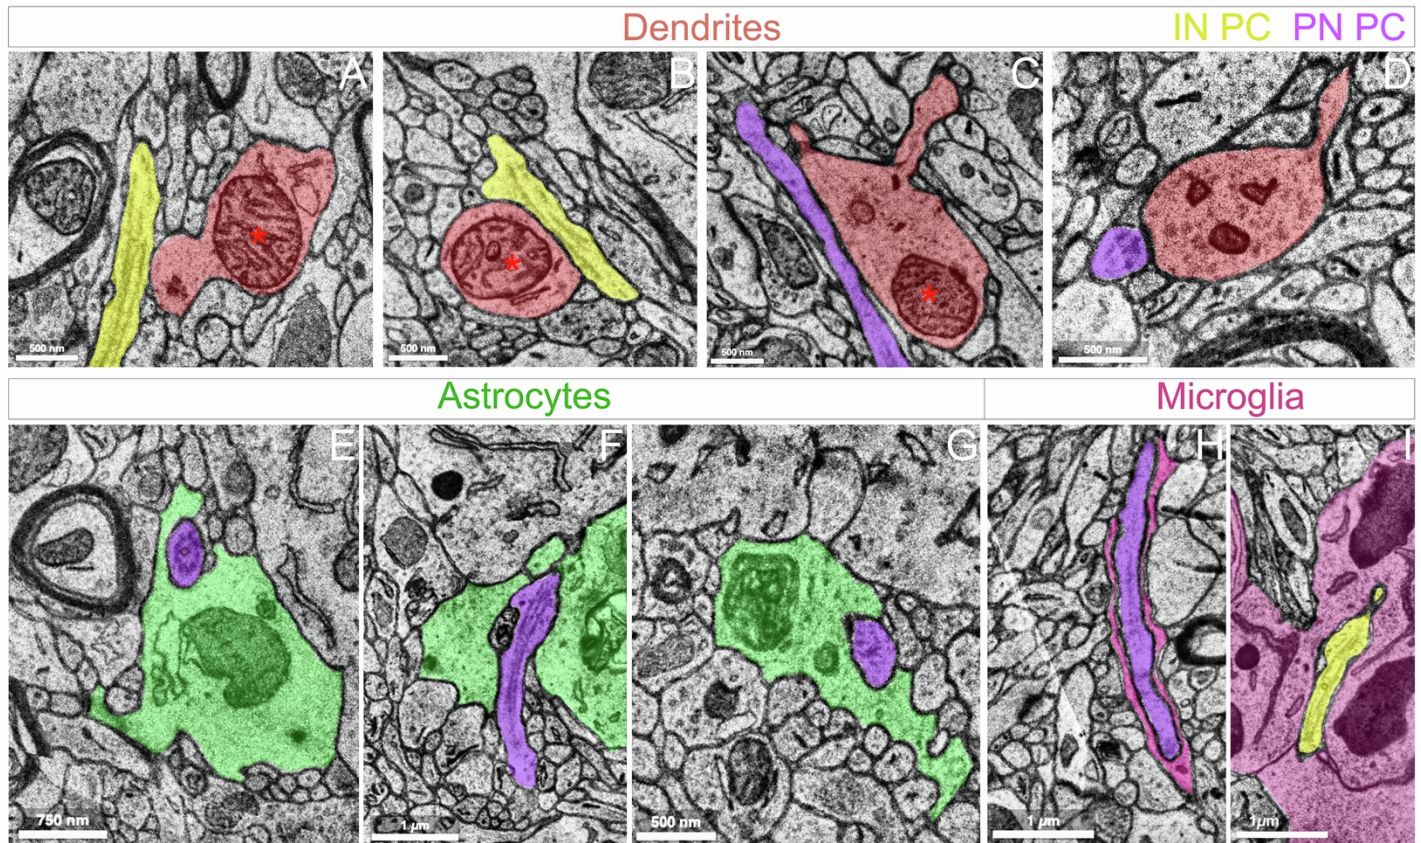

**Supplemental Figure 8. Neuronal primary cilia contacts with dendrites and glia** (Related to Figures 5, 6, and S4). (A-D) Neuronal primary cilia make membrane contacts with dendritic spines. Some of the dendritic spines have large mitochondria (asterisk, A-C). (E-G) Neuronal primary cilia are often encircled by astrocytes. (H-I) Microglial encirclement of projection neuronal (H) or interneuronal (I) primary cilia. Primary cilia from inhibitory and excitatory neurons are highlighted in yellow and purple, respectively. Astrocytes and microglia are colored green and magenta, respectively. IN PC, interneuron primary cilia; PN PC, projection neuron primary cilia. Neuroglancer links to images in A-I are as follows- [A](#), [B](#), [C](#), [D](#), [E](#), [F](#), [G](#), [H](#), [I](#).

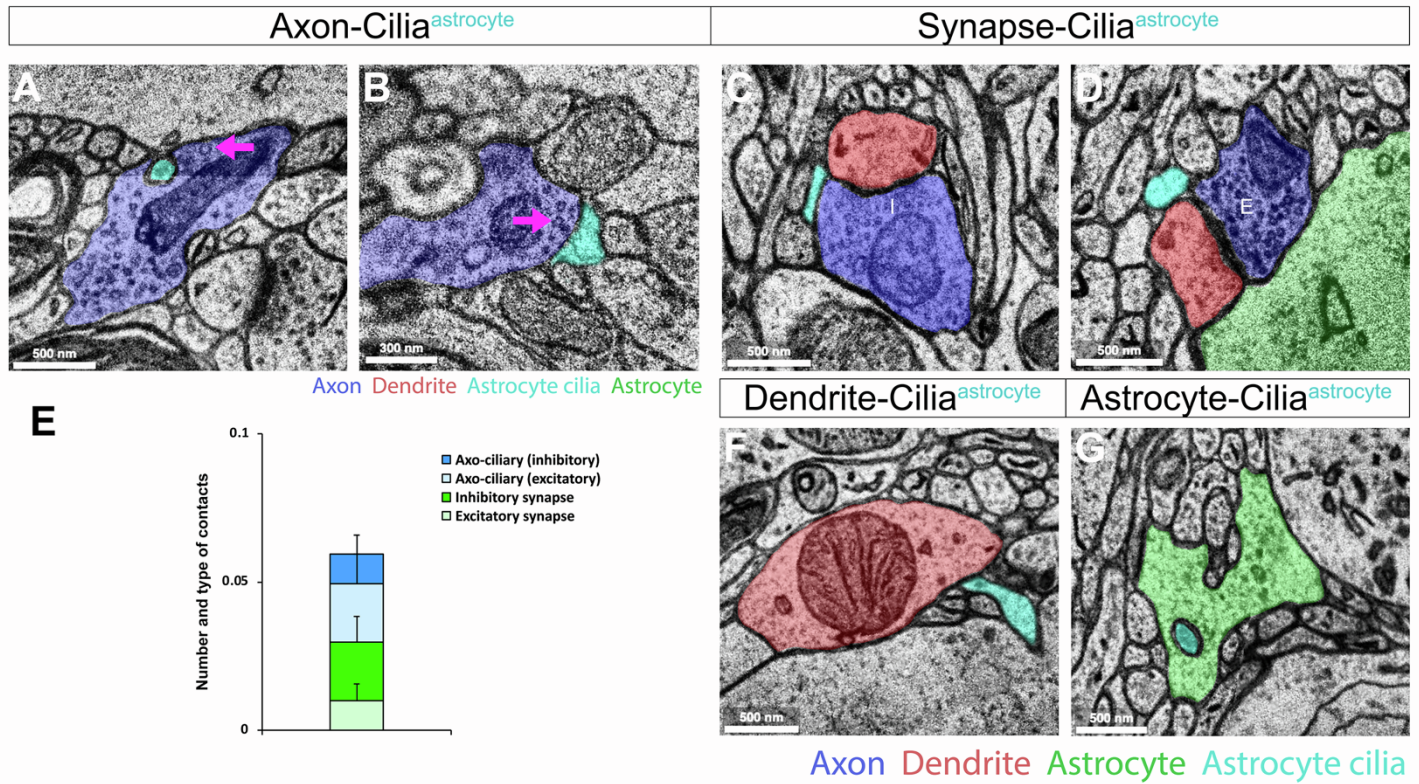

**Supplemental Figure 9. Diversity of astrocyte primary cilia contacts** (Related to Figure 7). (A) Axo-ciliary contacts. Astrocyte primary cilia (teal) make membrane contacts with axonal domains that are enriched in vesicles (arrow, A-B). (C-D) Astrocyte primary cilia (teal) can also associate with synapses. Synapse type (excitatory [E] and inhibitory [I]) is indicated in each panel. (E) Quantification of different types of astrocyte cilia-axon and -synapse contacts. Astrocyte cilia also come in contact with dendritic spines (F) and are encircled by other astrocytes (G). Neuroglancer links to images in A-G are as follows- [A](#), [B](#), [C](#), [D](#), [F](#), [G](#).

IN PC

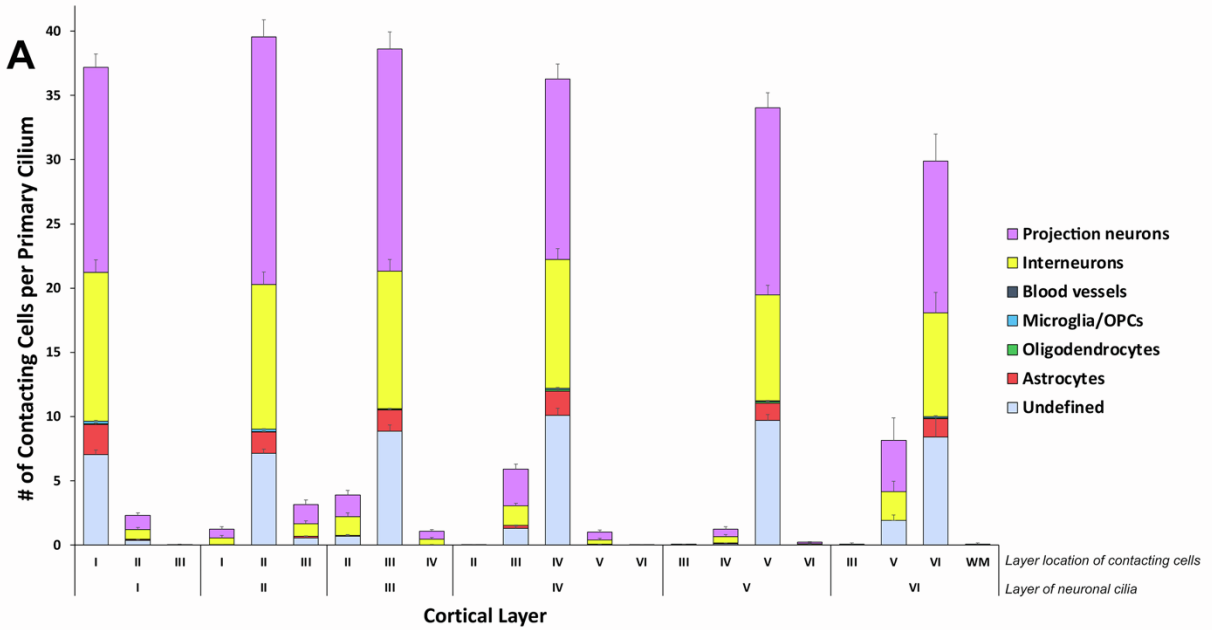

PN PC

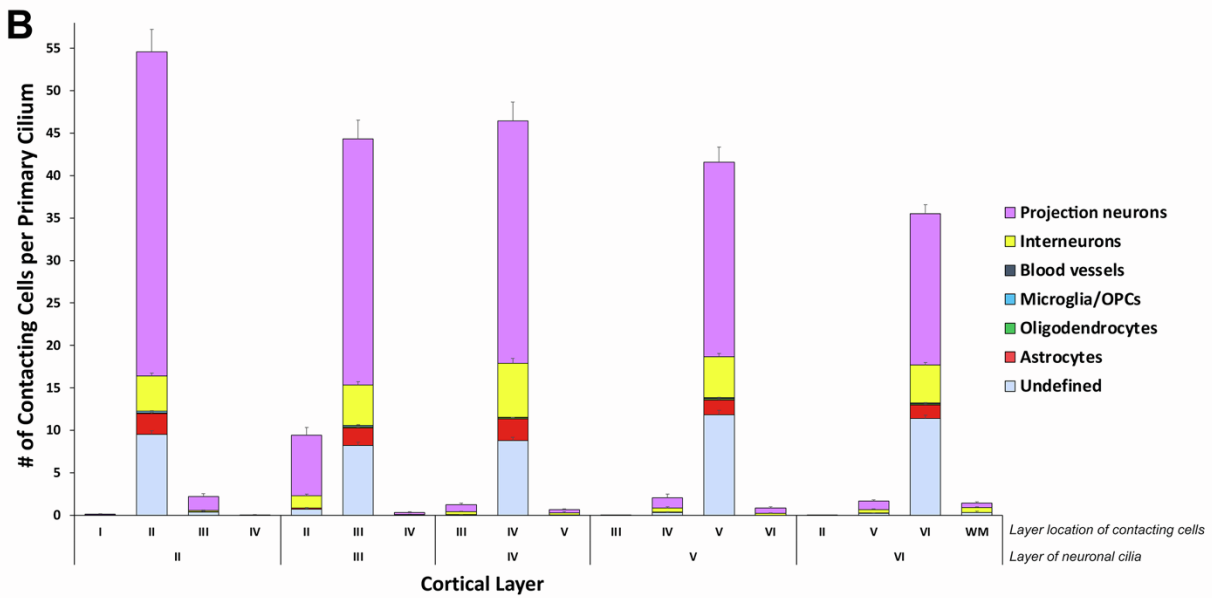

Astrocyte PC

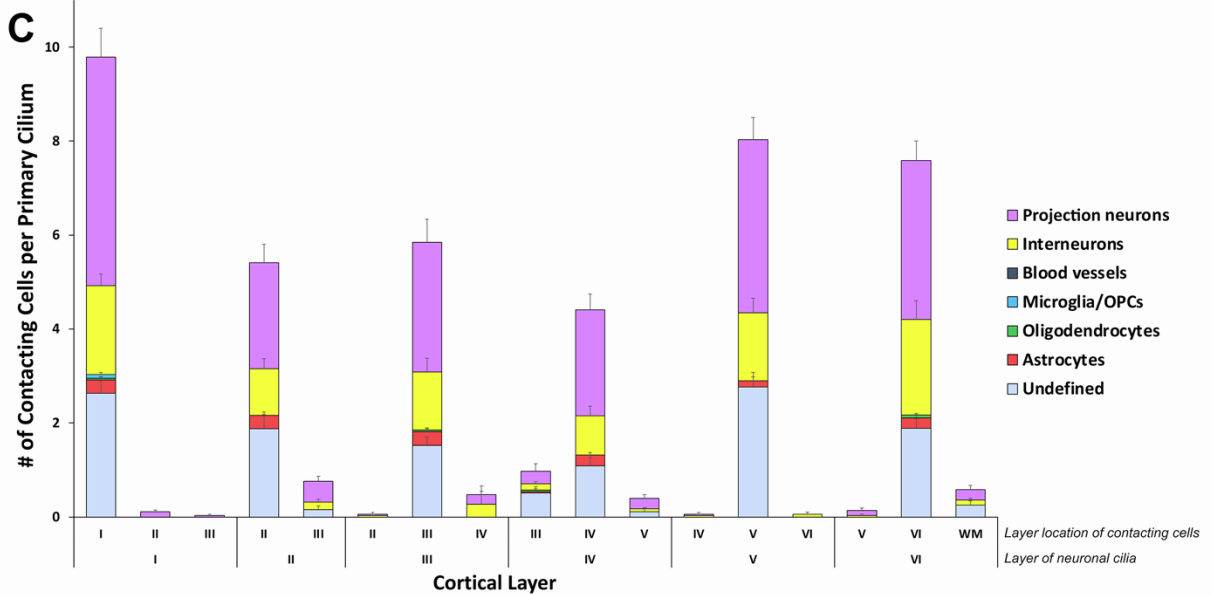



**Supplemental Figure 10. Cortical layer origin of primary cilia contacting cells** (Related to Figures 5, 6, and 7). The layer location of cells contacting the primary cilium of interneurons (A), projection neurons (B), and astrocytes (C) of each cortical layer was quantified. The majority of cellular contacts of a neuronal or glial cilium originated from the same or adjacent layer. IN, interneuron; PN, projection neuron; PC, primary cilia; I-VI, cortical layers. Data shown are mean  $\pm$  SEM.

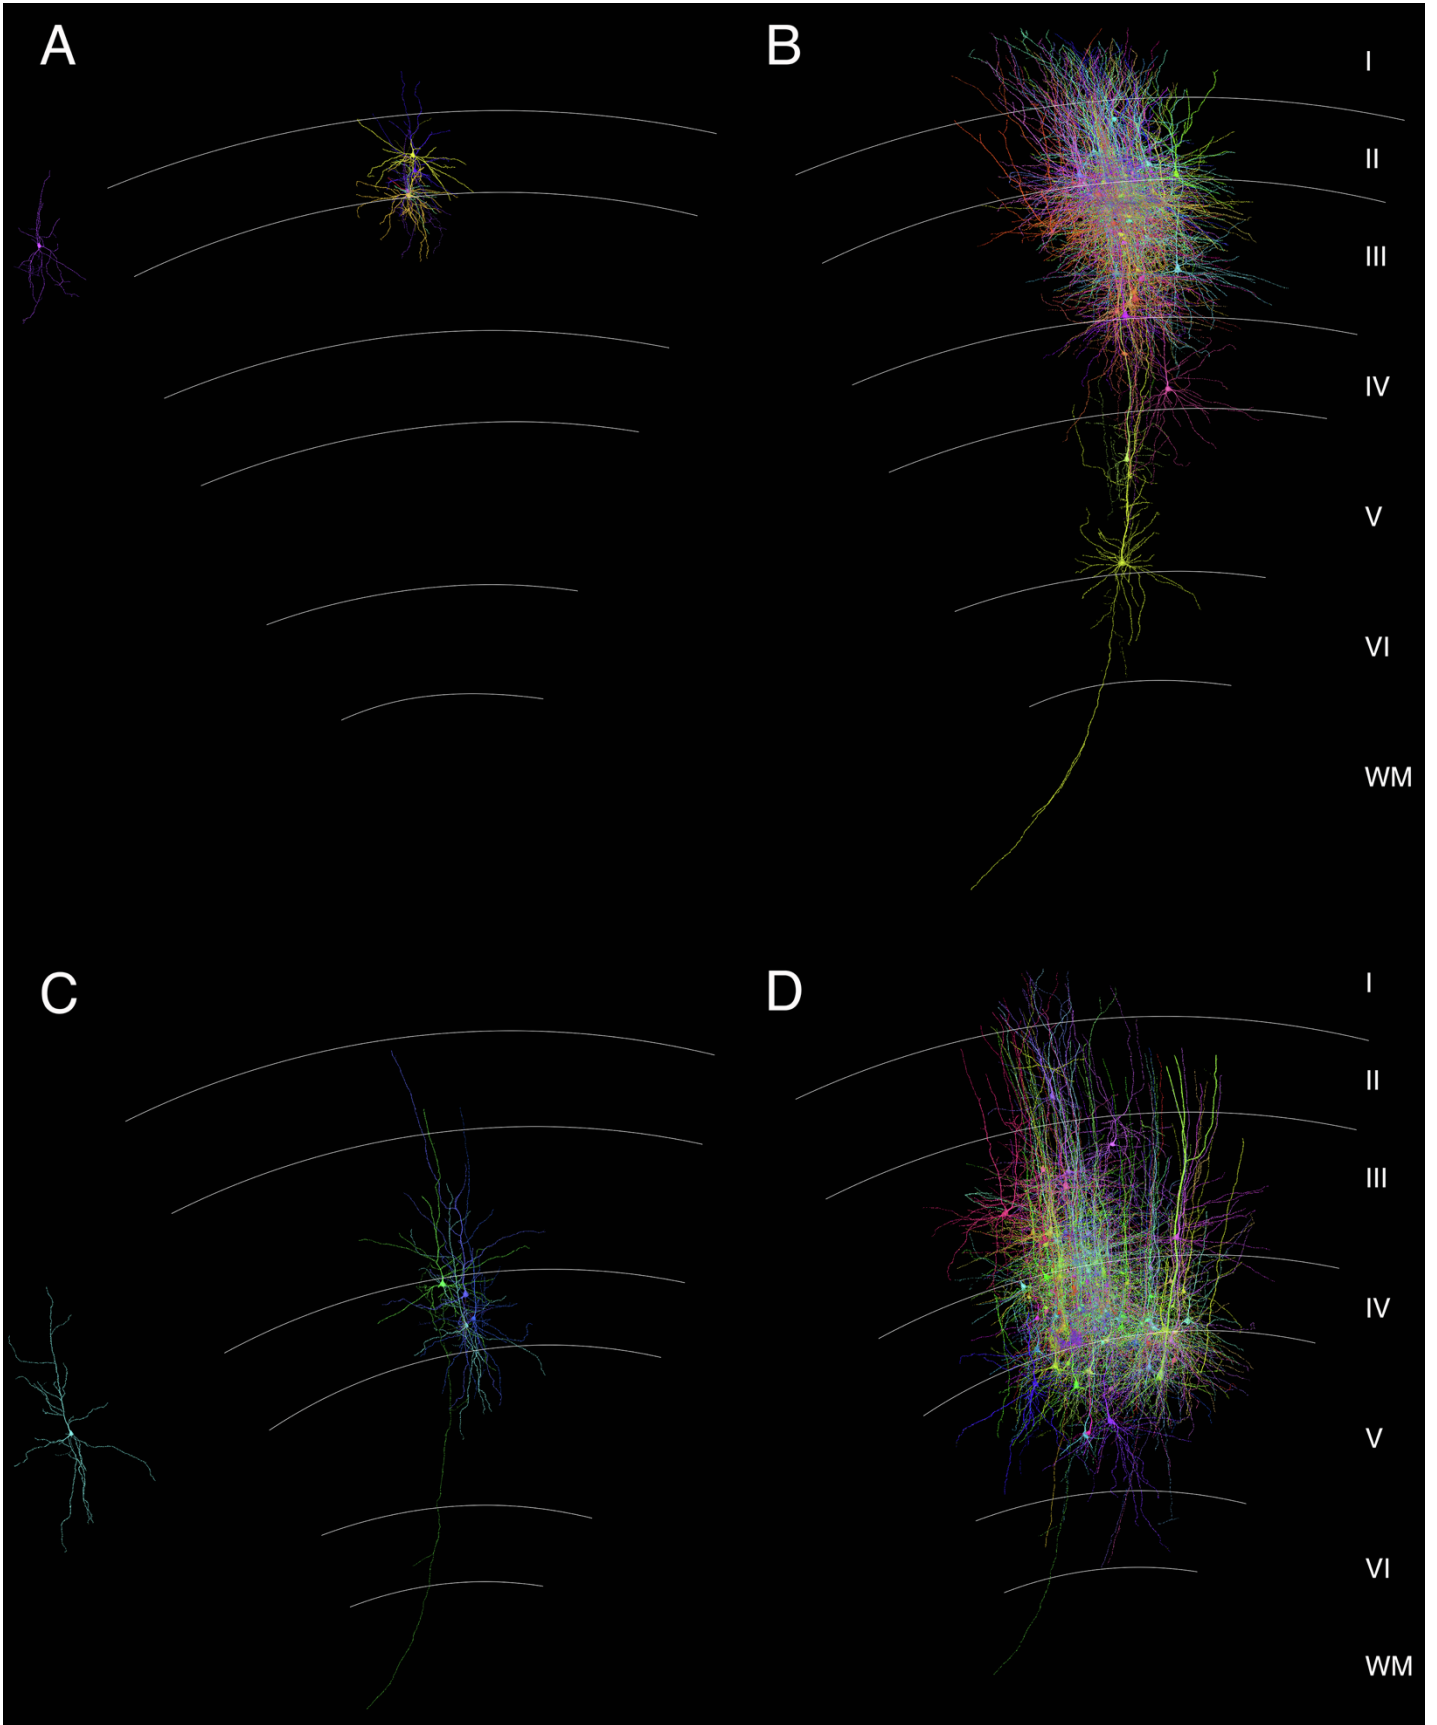

**Supplemental Figure 11. Distinct nature of primary cilia and neuronal connectome**  
(Related to Figures 5, 6, and S4). Primary cilia connectome of a layer 2 interneuron (A) and a layer 5 projection neuron (C). Cells contacting the primary cilia of these neurons come from the same or adjacent layers (A and C). In contrast, the synaptic connectivity of these neurons is extensive and spans multiple layers (B and D, respectively). Astrocytes contacting the respective primary cilia or the neuron were excluded for clarity. Insets (left) show each neuron without its ciliary or synaptic contacts. I-VI, cortical layers.

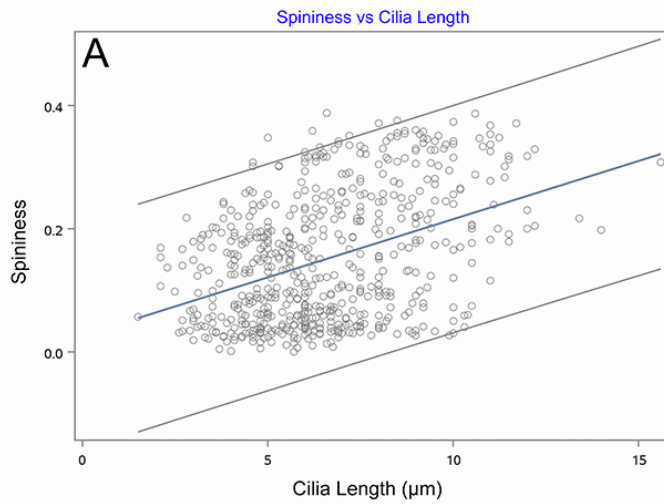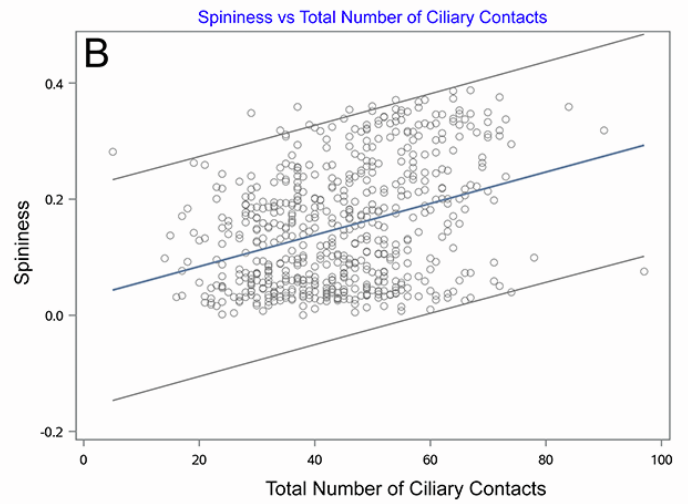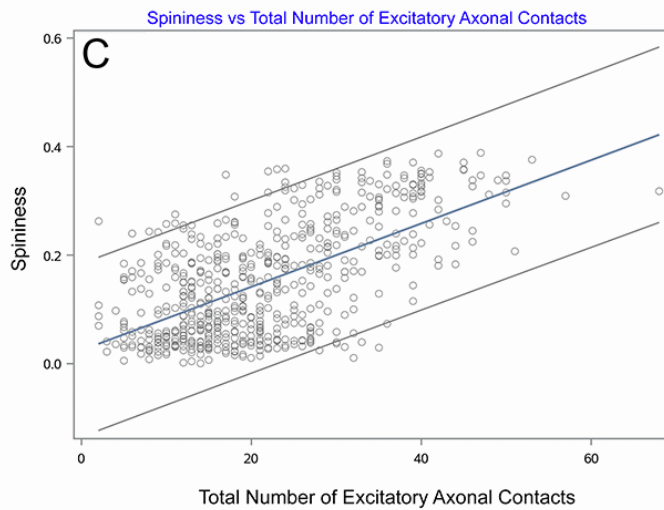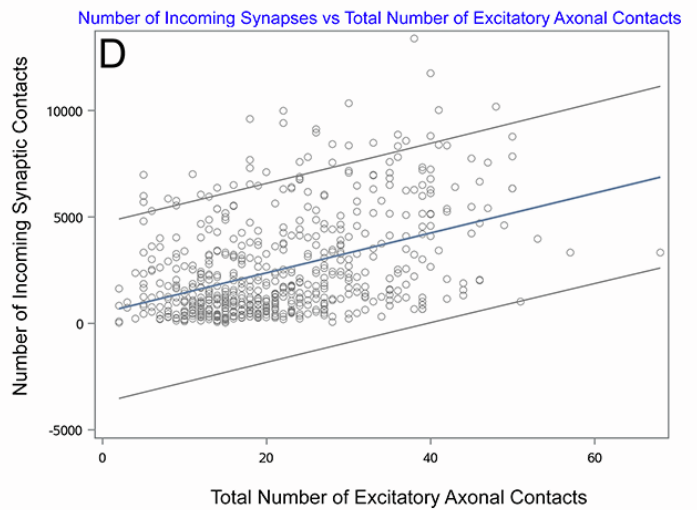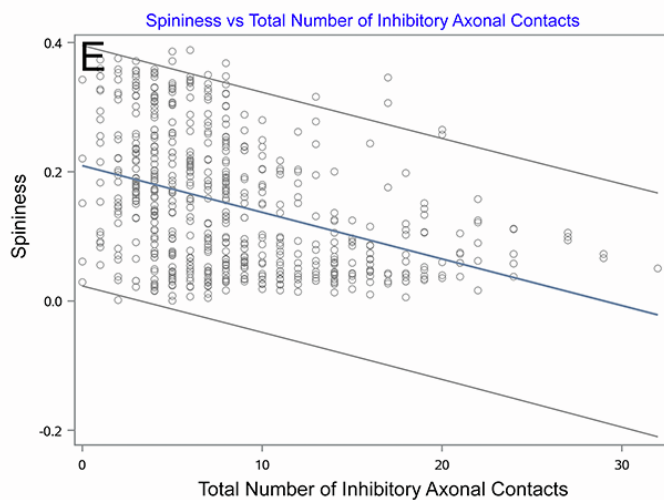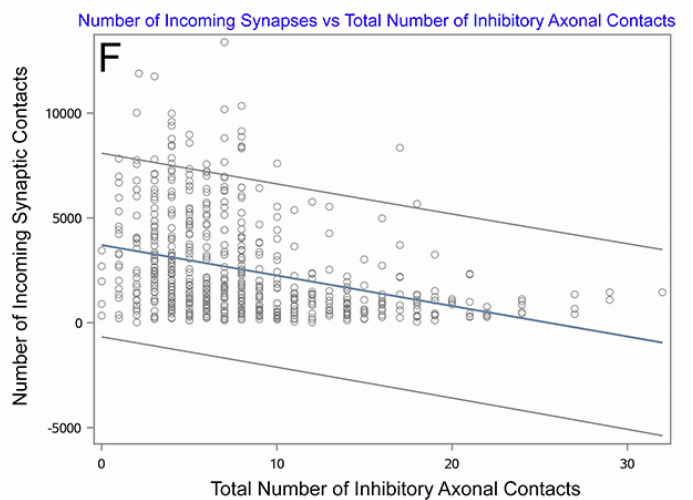

**Supplemental Figure 12. Relationship between neuronal cilia and spininess of cortical neurons** (Related to Figures 5, 6, 8, and S7). (A) Cilia length is positively correlated with the spininess of neurons (Pearson's  $r$ , 0.41,  $p < 1E^{-16}$ ). Spininess of a

neuron is positively correlated with the total number of ciliary contacts ( $r, 0.352, p < 1E^{-16}$ , B) and with the number of excitatory axonal contacts ( $r, 0.614, p < 1E^{-16}$ , C) of a neuronal cilium. (D) The number of excitatory axonal contacts of cilia positively correlates with the number of incoming synapses to neurons ( $r, 0.43, p < 1E^{-16}$ ). (E-F) The number of inhibitory axonal contacts of cilia negatively correlates with the spininess ( $r, -0.39, p < 1E^{-16}$ ) and the number of incoming synapses to neurons ( $r, -0.34, p = 1E^{-16}$ ).

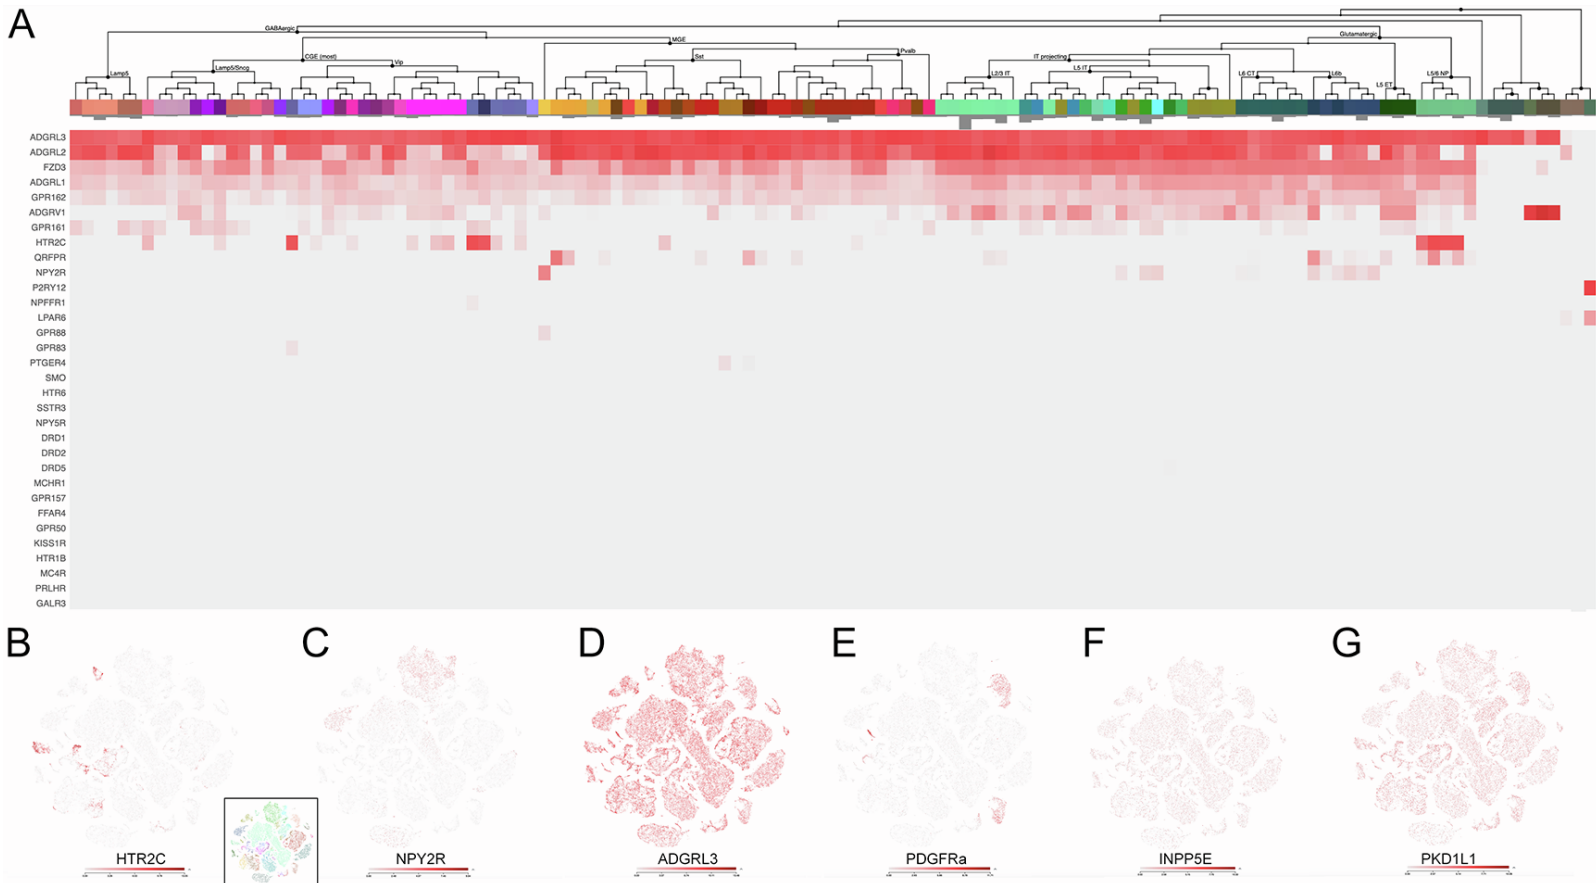

**Supplemental Figure 13. Human cortical neuronal expression of cilia-associated signaling receptors, ion channels, and second messengers** (Related to Figures 1, 4, 5, 6, 7, 8, S1, S4, and S4). Adult human brain cell expression pattern of the GPCRs known to be associated with primary cilia (A). These cell surface signaling receptors were screened for their expression pattern in Allen Brain Atlas's adult human cortex and hippocampus cell type-specific RNASeq database (M1-10X Genomics). Scatter plots of expression of cilia-associated GPCRs in subsets of cortical neurons (HTR2C in VIP<sup>+</sup> INs [B], NPY2R in SST<sup>+</sup> INs [C]), and ADGRL3 in all cortical neurons [D]). Similarly distinct expression patterns were also noticed for other cilia-linked receptors (e.g., PDGFR in LAMP5<sup>+</sup> INs [E]), second messengers (e.g., INPP5E in all cortical neurons [F]), and ion channels (e.g., PKD1L1 in all cortical neurons [G]). Inset (B) shows reference cell type-specific atlas of the scatter plots (Hodge et al., 2019; Allen Brain Map, Cell Types Database: RNA-Seq Data [<https://portal.brain-map.org/atlasses-and-data/rnaseq>]).

| Figure                | Panels            |                    |                     |                      |                     |                    |                     |                   |                     |                      |                      |                     |                    |                     |                   |                   |
|-----------------------|-------------------|--------------------|---------------------|----------------------|---------------------|--------------------|---------------------|-------------------|---------------------|----------------------|----------------------|---------------------|--------------------|---------------------|-------------------|-------------------|
| Figure 8              | <b>A:</b>         | <a href="#">LI</a> | <a href="#">LII</a> | <a href="#">LIII</a> | <a href="#">LIV</a> | <a href="#">LV</a> | <a href="#">LVI</a> | <b>B:</b>         | <a href="#">LII</a> | <a href="#">LIII</a> | <a href="#">LIII</a> | <a href="#">LIV</a> | <a href="#">LV</a> | <a href="#">LVI</a> | <a href="#">C</a> | <a href="#">D</a> |
| Supplemental Figure 7 | <a href="#">A</a> | <a href="#">B</a>  | <a href="#">C</a>   | <a href="#">D</a>    |                     | <a href="#">F</a>  | <a href="#">G</a>   | <a href="#">H</a> | <a href="#">I</a>   | <a href="#">J</a>    | <a href="#">K</a>    |                     |                    |                     |                   |                   |
| Supplemental Figure 8 | <a href="#">A</a> | <a href="#">B</a>  | <a href="#">C</a>   | <a href="#">D</a>    | <a href="#">E</a>   | <a href="#">F</a>  | <a href="#">G</a>   | <a href="#">H</a> | <a href="#">I</a>   |                      |                      |                     |                    |                     |                   |                   |
| Supplemental Figure 9 | <a href="#">A</a> | <a href="#">B</a>  | <a href="#">C</a>   | <a href="#">D</a>    |                     | <a href="#">F</a>  | <a href="#">G</a>   |                   |                     |                      |                      |                     |                    |                     |                   |                   |

## SUPPLEMENTAL TABLES

**Supplemental Table 1. Identity of all the interneurons and projections examined in this study** (Related to Figures 1, 2, and 3). Neuronal cell identity numbers with links to their location in Neuroglancer are listed for interneurons and projection neurons from all 6 cortical layers. (Please note the links are easier to access if the PDF is opened in Google Chrome instead of Adobe Acrobat).



**Table 1: Cortical neuronal primary cilia**

| Interneurons with Primary Cilia |                             |                             |                             |                             |                             | Projection Neurons with Primary Cilia |                            |                             |                             |                             |
|---------------------------------|-----------------------------|-----------------------------|-----------------------------|-----------------------------|-----------------------------|---------------------------------------|----------------------------|-----------------------------|-----------------------------|-----------------------------|
| Layer 1                         | Layer 2                     | Layer 3                     | Layer 4                     | Layer 5                     | Layer 6                     | Layer 2                               | Layer 3                    | Layer 4                     | Layer 5                     | Layer 6                     |
| <a href="#">37146142910</a>     | <a href="#">2718663948</a>  | <a href="#">4638898421</a>  | <a href="#">32791599134</a> | <a href="#">6165551025</a>  | <a href="#">33516085703</a> | <a href="#">1450376143</a>            | <a href="#">3387696184</a> | <a href="#">29193343834</a> | <a href="#">6513769803</a>  | <a href="#">5015430105</a>  |
| <a href="#">1787105373</a>      | <a href="#">2120678770</a>  | <a href="#">4275786135</a>  | <a href="#">32661562811</a> | <a href="#">4840261666</a>  | <a href="#">6017103252</a>  | <a href="#">2602073423</a>            | <a href="#">2542472136</a> | <a href="#">6864952954</a>  | <a href="#">6907908318</a>  | <a href="#">5012275127</a>  |
| <a href="#">2137208420</a>      | <a href="#">3125257652</a>  | <a href="#">3882494653</a>  | <a href="#">3995330445</a>  | <a href="#">3630670085</a>  | <a href="#">39962851803</a> | <a href="#">1144733018</a>            | <a href="#">3925990067</a> | <a href="#">32370126505</a> | <a href="#">5422636543</a>  | <a href="#">4196721639</a>  |
| <a href="#">3680606691</a>      | <a href="#">3505468100</a>  | <a href="#">5309538535</a>  | <a href="#">5190802710</a>  | <a href="#">3891078930</a>  | <a href="#">33866261968</a> | <a href="#">3518798548</a>            | <a href="#">3590955885</a> | <a href="#">32194884853</a> | <a href="#">6077169826</a>  | <a href="#">4650667613</a>  |
| <a href="#">37263286765</a>     | <a href="#">30202520112</a> | <a href="#">6270371417</a>  | <a href="#">33331734971</a> | <a href="#">4198064933</a>  | <a href="#">5521456474</a>  | <a href="#">1087542412</a>            | <a href="#">3562439721</a> | <a href="#">4302872019</a>  | <a href="#">7052633592</a>  | <a href="#">6382769913</a>  |
| <a href="#">1190245536</a>      | <a href="#">1451297107</a>  | <a href="#">38658046334</a> | <a href="#">56268867905</a> | <a href="#">4476359994</a>  | <a href="#">6570362443</a>  | <a href="#">31046662942</a>           | <a href="#">2702674358</a> | <a href="#">4913528885</a>  | <a href="#">4691667594</a>  | <a href="#">6981906973</a>  |
| <a href="#">1394191353</a>      | <a href="#">3198787432</a>  | <a href="#">2351346522</a>  | <a href="#">3456758527</a>  | <a href="#">4679607351</a>  | <a href="#">6717175479</a>  | <a href="#">2091155727</a>            | <a href="#">5075775279</a> | <a href="#">5075322225</a>  | <a href="#">5918005808</a>  | <a href="#">33471670504</a> |
| <a href="#">3113022318</a>      | <a href="#">4946396640</a>  | <a href="#">3515979249</a>  | <a href="#">3531238060</a>  | <a href="#">5566456712</a>  | <a href="#">5580327531</a>  | <a href="#">2280501088</a>            | <a href="#">2629407821</a> | <a href="#">5482019597</a>  | <a href="#">3120073110</a>  | <a href="#">4604762284</a>  |
| <a href="#">3156431067</a>      | <a href="#">30187598118</a> | <a href="#">4858659202</a>  | <a href="#">4679722794</a>  | <a href="#">6544359249</a>  | <a href="#">34230002763</a> | <a href="#">3722481176</a>            | <a href="#">2629129838</a> | <a href="#">6326350514</a>  | <a href="#">3528902155</a>  | <a href="#">5348331739</a>  |
| <a href="#">4409589695</a>      | <a href="#">58560947015</a> | <a href="#">30624168062</a> | <a href="#">4756145379</a>  | <a href="#">6879101098</a>  | <a href="#">4472579416</a>  | <a href="#">3140018733</a>            | <a href="#">3459620418</a> | <a href="#">6500949268</a>  | <a href="#">5581378299</a>  | <a href="#">7285402573</a>  |
| <a href="#">1423553872</a>      | <a href="#">58663315438</a> | <a href="#">32444504548</a> | <a href="#">5220472240</a>  | <a href="#">7039231083</a>  | <a href="#">5492502881</a>  | <a href="#">3402471987</a>            | <a href="#">4841385043</a> | <a href="#">6677125078</a>  | <a href="#">4094208392</a>  | <a href="#">5273488042</a>  |
| <a href="#">1452668296</a>      | <a href="#">1130278365</a>  | <a href="#">37522862988</a> | <a href="#">5453255395</a>  | <a href="#">31230444707</a> | <a href="#">7401757982</a>  | <a href="#">3489216996</a>            | <a href="#">5075979625</a> | <a href="#">3878288639</a>  | <a href="#">4215470603</a>  | <a href="#">6292434122</a>  |
| <a href="#">1729080661</a>      | <a href="#">1449763370</a>  | <a href="#">39547803419</a> | <a href="#">5612478783</a>  | <a href="#">42428944531</a> |                             | <a href="#">2105961568</a>            | <a href="#">2993570100</a> | <a href="#">4011683186</a>  | <a href="#">4415590654</a>  | <a href="#">4997922584</a>  |
| <a href="#">2005856933</a>      | <a href="#">1858285103</a>  | <a href="#">2031190321</a>  | <a href="#">2844816353</a>  | <a href="#">3165277795</a>  |                             | <a href="#">30742013887</a>           | <a href="#">4306756083</a> | <a href="#">4624107703</a>  | <a href="#">5900936104</a>  | <a href="#">4997353939</a>  |
| <a href="#">3360318069</a>      | <a href="#">2338920806</a>  | <a href="#">3605090256</a>  | <a href="#">3458174974</a>  | <a href="#">5335761695</a>  |                             | <a href="#">1596327698</a>            | <a href="#">3358492873</a> | <a href="#">5860360217</a>  | <a href="#">33693108475</a> | <a href="#">5141786988</a>  |
| <a href="#">3403480065</a>      | <a href="#">2907424570</a>  | <a href="#">5061116204</a>  | <a href="#">3588896643</a>  | <a href="#">5814600156</a>  |                             | <a href="#">1728497220</a>            | <a href="#">3852445941</a> | <a href="#">32007131507</a> | <a href="#">4389878275</a>  | <a href="#">5390718424</a>  |
| <a href="#">36330415163</a>     | <a href="#">2979713896</a>  | <a href="#">5177967272</a>  | <a href="#">3866563836</a>  | <a href="#">6340396662</a>  |                             | <a href="#">1886902875</a>            | <a href="#">4450399407</a> | <a href="#">3020714778</a>  | <a href="#">4492479490</a>  | <a href="#">5975007104</a>  |
| <a href="#">636444441</a>       | <a href="#">3359150816</a>  | <a href="#">5469125788</a>  | <a href="#">4491632837</a>  | <a href="#">6747400414</a>  |                             | <a href="#">1931040660</a>            | <a href="#">2761371616</a> | <a href="#">3399332888</a>  | <a href="#">4722533363</a>  | <a href="#">6410715337</a>  |
| <a href="#">3301154728</a>      | <a href="#">3636599493</a>  | <a href="#">32370272208</a> | <a href="#">4856468392</a>  | <a href="#">33737933543</a> |                             | <a href="#">2950834375</a>            | <a href="#">2860905618</a> | <a href="#">3529456529</a>  | <a href="#">4939724073</a>  | <a href="#">31708920904</a> |
| <a href="#">4627598544</a>      | <a href="#">1801310916</a>  | <a href="#">32371237036</a> | <a href="#">5146312557</a>  | <a href="#">4910564616</a>  |                             | <a href="#">3256534868</a>            | <a href="#">3183397934</a> | <a href="#">5380337105</a>  | <a href="#">5352771787</a>  | <a href="#">6904345674</a>  |
| <a href="#">38485858513</a>     | <a href="#">5384426784</a>  | <a href="#">39428921609</a> | <a href="#">6121790491</a>  | <a href="#">4111160213</a>  |                             | <a href="#">4363495628</a>            | <a href="#">3517950418</a> | <a href="#">6342515021</a>  | <a href="#">6456401608</a>  | <a href="#">4706559981</a>  |
| <a href="#">460458122</a>       | <a href="#">5733156051</a>  | <a href="#">41819250669</a> | <a href="#">13910213238</a> | <a href="#">5887343270</a>  |                             | <a href="#">2178659041</a>            | <a href="#">4741455769</a> | <a href="#">32413053449</a> | <a href="#">4197890854</a>  | <a href="#">5726746103</a>  |
| <a href="#">533711979</a>       | <a href="#">29459622174</a> | <a href="#">41995120012</a> | <a href="#">30372826830</a> | <a href="#">6601988172</a>  |                             | <a href="#">4800503033</a>            | <a href="#">5163674335</a> | <a href="#">33170917656</a> | <a href="#">4519330988</a>  | <a href="#">5841641104</a>  |
| <a href="#">1613060545</a>      | <a href="#">37581631856</a> | <a href="#">1245656455</a>  | <a href="#">31568253559</a> | <a href="#">33677281270</a> |                             | <a href="#">1522022884</a>            | <a href="#">5849014680</a> | <a href="#">33184336456</a> | <a href="#">5598008907</a>  | <a href="#">39714911298</a> |
| <a href="#">402243212</a>       | <a href="#">37787097036</a> | <a href="#">4361422065</a>  | <a href="#">38598226398</a> | <a href="#">41902636649</a> |                             | <a href="#">2484316542</a>            | <a href="#">6067314832</a> | <a href="#">2786572808</a>  | <a href="#">5872566163</a>  | <a href="#">5055406469</a>  |
| <a href="#">36942459652</a>     | <a href="#">38761962949</a> | <a href="#">4624939761</a>  | <a href="#">38918762655</a> | <a href="#">69358211160</a> |                             | <a href="#">2485369079</a>            | <a href="#">3430549988</a> | <a href="#">3180420219</a>  | <a href="#">30036113523</a> | <a href="#">5272919263</a>  |
| <a href="#">37452370153</a>     | <a href="#">38878740946</a> | <a href="#">4902169919</a>  | <a href="#">40578793854</a> | <a href="#">5159191086</a>  |                             | <a href="#">3460232910</a>            | <a href="#">3882785546</a> | <a href="#">3208569762</a>  | <a href="#">32837446270</a> | <a href="#">5959209063</a>  |
| <a href="#">5005850706</a>      | <a href="#">40320605179</a> | <a href="#">5687893999</a>  | <a href="#">42138312710</a> | <a href="#">4139325860</a>  |                             | <a href="#">3518681641</a>            | <a href="#">2484069388</a> | <a href="#">3923858755</a>  | <a href="#">4241562819</a>  | <a href="#">6162731760</a>  |
| <a href="#">36534317289</a>     | <a href="#">45617277589</a> | <a href="#">5965472721</a>  | <a href="#">2742433932</a>  | <a href="#">4561615237</a>  |                             | <a href="#">1392936586</a>            | <a href="#">2498888339</a> | <a href="#">4157284371</a>  | <a href="#">5276699233</a>  | <a href="#">6251229281</a>  |
| <a href="#">36621675715</a>     | <a href="#">45878986196</a> | <a href="#">6430938176</a>  | <a href="#">3135331454</a>  | <a href="#">6107131430</a>  |                             | <a href="#">3097120902</a>            | <a href="#">3298206355</a> | <a href="#">4404218019</a>  | <a href="#">4054800495</a>  | <a href="#">30995793577</a> |
| <a href="#">57352977341</a>     | <a href="#">2369144469</a>  | <a href="#">29383098617</a> | <a href="#">4302346100</a>  | <a href="#">6121834307</a>  |                             | <a href="#">28717044681</a>           | <a href="#">4028123903</a> | <a href="#">4535129012</a>  | <a href="#">3922677106</a>  | <a href="#">32874985597</a> |
| <a href="#">53711736279</a>     | <a href="#">2587780387</a>  | <a href="#">29996426864</a> | <a href="#">4710473618</a>  | <a href="#">4300856796</a>  |                             | <a href="#">30538009064</a>           | <a href="#">5438945541</a> | <a href="#">5891606808</a>  | <a href="#">6848234050</a>  | <a href="#">5216105078</a>  |
| <a href="#">1918849113</a>      | <a href="#">3504882559</a>  | <a href="#">32006576283</a> | <a href="#">5817331865</a>  | <a href="#">5131492402</a>  |                             | <a href="#">31557144036</a>           | <a href="#">2933472324</a> | <a href="#">5931875589</a>  | <a href="#">4592526340</a>  | <a href="#">5754239725</a>  |
| <a href="#">520117544</a>       | <a href="#">36882405719</a> | <a href="#">37113947425</a> | <a href="#">32180430283</a> | <a href="#">5188348808</a>  |                             | <a href="#">1901152704</a>            | <a href="#">5689193184</a> | <a href="#">3749127975</a>  | <a href="#">5159993420</a>  | <a href="#">6381703408</a>  |
| <a href="#">38034714996</a>     | <a href="#">40218295373</a> | <a href="#">38585771987</a> | <a href="#">33418434625</a> | <a href="#">5335030417</a>  |                             | <a href="#">39112226336</a>           | <a href="#">852830461</a>  | <a href="#">3254783068</a>  | <a href="#">3222499167</a>  | <a href="#">5216747637</a>  |
| <a href="#">45021732268</a>     | <a href="#">4043892994</a>  | <a href="#">1886245145</a>  | <a href="#">37970340183</a> | <a href="#">4737485281</a>  |                             | <a href="#">36533601596</a>           | <a href="#">4406450407</a> | <a href="#">3922442762</a>  | <a href="#">5654092357</a>  | <a href="#">5234152619</a>  |





**Supplemental Table 2. Identity and primary cilia contactome of all the astrocytes examined in this study** (Related to Figures 1 and 7). Astrocyte cell identity numbers with links to their location in Neuroglancer are listed in the 'Astrocyte Cilia' column for astrocytes from all 6 cortical layers. For the same astrocytes, cell identity numbers with links to electron micrographs and 3D images showing all the contacting cells of the respective astrocyte cilium is listed in the 'Astrocyte Cilia Connectome' column.



**Supplemental Table 3. Construction of neuronal primary cilia contactome** (Related to Figures 1, 2, 3, 5, and 6). Neuronal cell identity numbers with links to electron micrographs and 3D images showing all the contacting cells of the respective neuronal cilium. These are the same neurons with primary cilia listed in Table 1.

**Table 3. Cortical neuronal primary cilia and their contactome**

| Interneurons with Primary Cilia and all the Ciliary Contacts |                             |                             |                             |                             |                             | Projection Neurons with Primary Cilia and all the Ciliary Contacts |                            |                             |                             |                             |
|--------------------------------------------------------------|-----------------------------|-----------------------------|-----------------------------|-----------------------------|-----------------------------|--------------------------------------------------------------------|----------------------------|-----------------------------|-----------------------------|-----------------------------|
| Layer 1                                                      | Layer 2                     | Layer 3                     | Layer 4                     | Layer 5                     | Layer 6                     | Layer 2                                                            | Layer 3                    | Layer 4                     | Layer 5                     | Layer 6                     |
| <a href="#">37146142910</a>                                  | <a href="#">2718663948</a>  | <a href="#">4638898421</a>  | <a href="#">32791599134</a> | <a href="#">6165551025</a>  | <a href="#">33516085703</a> | <a href="#">1450376143</a>                                         | <a href="#">3387696184</a> | <a href="#">29193343834</a> | <a href="#">6513769803</a>  | <a href="#">5015430105</a>  |
| <a href="#">1787105373</a>                                   | <a href="#">2120678770</a>  | <a href="#">4275786135</a>  | <a href="#">32661562811</a> | <a href="#">4840261666</a>  | <a href="#">6017103252</a>  | <a href="#">2602073423</a>                                         | <a href="#">2542472136</a> | <a href="#">6864952954</a>  | <a href="#">6907908318</a>  | <a href="#">5012275127</a>  |
| <a href="#">2137208420</a>                                   | <a href="#">3125257652</a>  | <a href="#">3882494653</a>  | <a href="#">3995330445</a>  | <a href="#">3630670085</a>  | <a href="#">39962851803</a> | <a href="#">1144733018</a>                                         | <a href="#">3925990067</a> | <a href="#">32370126505</a> | <a href="#">5422636543</a>  | <a href="#">4196721639</a>  |
| <a href="#">3680606691</a>                                   | <a href="#">3505468100</a>  | <a href="#">5309538535</a>  | <a href="#">5190802710</a>  | <a href="#">3891078930</a>  | <a href="#">33866261968</a> | <a href="#">3518798548</a>                                         | <a href="#">3590955885</a> | <a href="#">32194884853</a> | <a href="#">6077169826</a>  | <a href="#">4650667613</a>  |
| <a href="#">37263286765</a>                                  | <a href="#">30202520112</a> | <a href="#">6270371417</a>  | <a href="#">33331734971</a> | <a href="#">4198064933</a>  | <a href="#">5521456474</a>  | <a href="#">1087542412</a>                                         | <a href="#">3562439721</a> | <a href="#">4302872019</a>  | <a href="#">7052633592</a>  | <a href="#">6382769913</a>  |
| <a href="#">1190245536</a>                                   | <a href="#">1451297107</a>  | <a href="#">38658046334</a> | <a href="#">56268867905</a> | <a href="#">4476359994</a>  | <a href="#">6570362443</a>  | <a href="#">31046662942</a>                                        | <a href="#">2702674358</a> | <a href="#">4913528885</a>  | <a href="#">4691667594</a>  | <a href="#">6981906973</a>  |
| <a href="#">1394191353</a>                                   | <a href="#">3198787432</a>  | <a href="#">2351346522</a>  | <a href="#">3456758527</a>  | <a href="#">4679607351</a>  | <a href="#">6717175479</a>  | <a href="#">2091155727</a>                                         | <a href="#">5075775279</a> | <a href="#">5075322225</a>  | <a href="#">5918005808</a>  | <a href="#">33471670504</a> |
| <a href="#">3113022318</a>                                   | <a href="#">4946396640</a>  | <a href="#">3515979249</a>  | <a href="#">3531238060</a>  | <a href="#">5566456712</a>  | <a href="#">5580327531</a>  | <a href="#">2280501088</a>                                         | <a href="#">2629407821</a> | <a href="#">5482019597</a>  | <a href="#">3120073110</a>  | <a href="#">4604762284</a>  |
| <a href="#">3156431067</a>                                   | <a href="#">30187598118</a> | <a href="#">4858659202</a>  | <a href="#">4679722794</a>  | <a href="#">6544359249</a>  | <a href="#">34230002763</a> | <a href="#">3722481176</a>                                         | <a href="#">2629129838</a> | <a href="#">6326350514</a>  | <a href="#">3528902155</a>  | <a href="#">5348331739</a>  |
| <a href="#">4409589695</a>                                   | <a href="#">58560947015</a> | <a href="#">30624168062</a> | <a href="#">4756145379</a>  | <a href="#">6879101098</a>  | <a href="#">4472579416</a>  | <a href="#">3140018733</a>                                         | <a href="#">3459620418</a> | <a href="#">6500949268</a>  | <a href="#">5581378299</a>  | <a href="#">7285402573</a>  |
| <a href="#">1423553872</a>                                   | <a href="#">58663315438</a> | <a href="#">32444504548</a> | <a href="#">5220472240</a>  | <a href="#">7039231083</a>  | <a href="#">5492502881</a>  | <a href="#">3402471987</a>                                         | <a href="#">4841385043</a> | <a href="#">6677125078</a>  | <a href="#">4094208392</a>  | <a href="#">5273488042</a>  |
| <a href="#">1452668296</a>                                   | <a href="#">1130278365</a>  | <a href="#">37522862988</a> | <a href="#">5453255395</a>  | <a href="#">31230444707</a> | <a href="#">7401757982</a>  | <a href="#">3489216996</a>                                         | <a href="#">5075979625</a> | <a href="#">3878288639</a>  | <a href="#">4215470603</a>  | <a href="#">6292434122</a>  |
| <a href="#">1729080661</a>                                   | <a href="#">1449763370</a>  | <a href="#">39547803419</a> | <a href="#">5612478783</a>  | <a href="#">42428944531</a> |                             | <a href="#">2105961568</a>                                         | <a href="#">2993570100</a> | <a href="#">4011683186</a>  | <a href="#">4415590654</a>  | <a href="#">4997922584</a>  |
| <a href="#">2005856933</a>                                   | <a href="#">1858285103</a>  | <a href="#">2031190321</a>  | <a href="#">2844816353</a>  | <a href="#">3165277795</a>  |                             | <a href="#">30742013887</a>                                        | <a href="#">4306756083</a> | <a href="#">4624107703</a>  | <a href="#">5900936104</a>  | <a href="#">4997353939</a>  |
| <a href="#">3360318069</a>                                   | <a href="#">2338920806</a>  | <a href="#">3605090256</a>  | <a href="#">3458174974</a>  | <a href="#">5335761695</a>  |                             | <a href="#">1596327698</a>                                         | <a href="#">3358492873</a> | <a href="#">5860360217</a>  | <a href="#">33693108475</a> | <a href="#">5141786988</a>  |
| <a href="#">3403480065</a>                                   | <a href="#">2907424570</a>  | <a href="#">5061116204</a>  | <a href="#">3588896643</a>  | <a href="#">5814600156</a>  |                             | <a href="#">1728497220</a>                                         | <a href="#">3852445941</a> | <a href="#">32007131507</a> | <a href="#">4389878275</a>  | <a href="#">5390718424</a>  |
| <a href="#">36330415163</a>                                  | <a href="#">2979713896</a>  | <a href="#">5177967272</a>  | <a href="#">3866563836</a>  | <a href="#">6340396662</a>  |                             | <a href="#">1886902875</a>                                         | <a href="#">4450399407</a> | <a href="#">3020714778</a>  | <a href="#">4492479490</a>  | <a href="#">5975007104</a>  |
| <a href="#">636444441</a>                                    | <a href="#">3359150816</a>  | <a href="#">5469125788</a>  | <a href="#">4491632837</a>  | <a href="#">6747400414</a>  |                             | <a href="#">1931040660</a>                                         | <a href="#">2761371616</a> | <a href="#">3399332888</a>  | <a href="#">4722533363</a>  | <a href="#">6410715337</a>  |
| <a href="#">3301154728</a>                                   | <a href="#">3636599493</a>  | <a href="#">32370272208</a> | <a href="#">4856468392</a>  | <a href="#">33737933543</a> |                             | <a href="#">2950834375</a>                                         | <a href="#">2860905618</a> | <a href="#">3529456529</a>  | <a href="#">4939724073</a>  | <a href="#">31708920904</a> |
| <a href="#">4627598544</a>                                   | <a href="#">1801310916</a>  | <a href="#">32371237036</a> | <a href="#">5146312557</a>  | <a href="#">4910564616</a>  |                             | <a href="#">3256534868</a>                                         | <a href="#">3183397934</a> | <a href="#">5380337105</a>  | <a href="#">5352771787</a>  | <a href="#">6904345674</a>  |
| <a href="#">38485858513</a>                                  | <a href="#">5384426784</a>  | <a href="#">39428921609</a> | <a href="#">6121790491</a>  | <a href="#">4111160213</a>  |                             | <a href="#">4363495628</a>                                         | <a href="#">3517950418</a> | <a href="#">6342515021</a>  | <a href="#">6456401608</a>  | <a href="#">4706559981</a>  |
| <a href="#">460458122</a>                                    | <a href="#">5733156051</a>  | <a href="#">41819250669</a> | <a href="#">13910213238</a> | <a href="#">5887343270</a>  |                             | <a href="#">2178659041</a>                                         | <a href="#">4741455769</a> | <a href="#">32413053449</a> | <a href="#">4197890854</a>  | <a href="#">5726746103</a>  |
| <a href="#">533711979</a>                                    | <a href="#">29459622174</a> | <a href="#">41995120012</a> | <a href="#">30372826830</a> | <a href="#">6601988172</a>  |                             | <a href="#">4800503033</a>                                         | <a href="#">5163674335</a> | <a href="#">33170917656</a> | <a href="#">4519330988</a>  | <a href="#">5841641104</a>  |
| <a href="#">1613060545</a>                                   | <a href="#">37581631856</a> | <a href="#">1245656455</a>  | <a href="#">31568253559</a> | <a href="#">33677281270</a> |                             | <a href="#">1522022884</a>                                         | <a href="#">5849014680</a> | <a href="#">33184336456</a> | <a href="#">5598008907</a>  | <a href="#">39714911298</a> |
| <a href="#">402243212</a>                                    | <a href="#">37787097036</a> | <a href="#">4361422065</a>  | <a href="#">38598226398</a> | <a href="#">41902636649</a> |                             | <a href="#">2484316542</a>                                         | <a href="#">6067314832</a> | <a href="#">2786572808</a>  | <a href="#">5872566163</a>  | <a href="#">5055406469</a>  |
| <a href="#">36942459652</a>                                  | <a href="#">38761962949</a> | <a href="#">4624939761</a>  | <a href="#">38918762655</a> | <a href="#">69358211160</a> |                             | <a href="#">2485369079</a>                                         | <a href="#">3430549988</a> | <a href="#">3180420219</a>  | <a href="#">30036113523</a> | <a href="#">5272919263</a>  |
| <a href="#">37452370153</a>                                  | <a href="#">38878740946</a> | <a href="#">4902169919</a>  | <a href="#">40578793854</a> | <a href="#">5159191086</a>  |                             | <a href="#">3460232910</a>                                         | <a href="#">3882785546</a> | <a href="#">3208569762</a>  | <a href="#">32837446270</a> | <a href="#">5959209063</a>  |
| <a href="#">5005850706</a>                                   | <a href="#">40320605179</a> | <a href="#">5687893999</a>  | <a href="#">42138312710</a> | <a href="#">4139325860</a>  |                             | <a href="#">3518681641</a>                                         | <a href="#">2484069388</a> | <a href="#">3923858755</a>  | <a href="#">4241562819</a>  | <a href="#">6162731760</a>  |
| <a href="#">36534317289</a>                                  | <a href="#">45617277589</a> | <a href="#">5965472721</a>  | <a href="#">2742433932</a>  | <a href="#">4561615237</a>  |                             | <a href="#">1392936586</a>                                         | <a href="#">2498888339</a> | <a href="#">4157284371</a>  | <a href="#">5276699233</a>  | <a href="#">6251229281</a>  |
| <a href="#">36621675715</a>                                  | <a href="#">45878986196</a> | <a href="#">6430938176</a>  | <a href="#">3135331454</a>  | <a href="#">6107131430</a>  |                             | <a href="#">3097120902</a>                                         | <a href="#">3298206355</a> | <a href="#">4404218019</a>  | <a href="#">4054800495</a>  | <a href="#">30995793577</a> |
| <a href="#">57352977341</a>                                  | <a href="#">2369144469</a>  | <a href="#">29383098617</a> | <a href="#">4302346100</a>  | <a href="#">6121834307</a>  |                             | <a href="#">28717044681</a>                                        | <a href="#">4028123903</a> | <a href="#">4535129012</a>  | <a href="#">3922677106</a>  | <a href="#">32874985597</a> |
| <a href="#">53711736279</a>                                  | <a href="#">2587780387</a>  | <a href="#">29996426864</a> | <a href="#">4710473618</a>  | <a href="#">4300856796</a>  |                             | <a href="#">30538009064</a>                                        | <a href="#">5438945541</a> | <a href="#">5891606808</a>  | <a href="#">6848234050</a>  | <a href="#">5216105078</a>  |
| <a href="#">1918849113</a>                                   | <a href="#">3504882559</a>  | <a href="#">32006576283</a> | <a href="#">5817331865</a>  | <a href="#">5131492402</a>  |                             | <a href="#">31557144036</a>                                        | <a href="#">2933472324</a> | <a href="#">5931875589</a>  | <a href="#">4592526340</a>  | <a href="#">5754239725</a>  |







**Supplemental Table 4. Comparison of the average number of contacts (cell types) made by a neuronal cilium (IN or PN) and an adjacent axonal segment of similar size** (Related to Figures 5, 6, and S4). IN, interneuron; PN, projection neuron. L1-L6, cortical layers. Data shown are mean  $\pm$  SEM.

**Table 4**

|          | Cell Types         | L1          |             | L2          |             | L3          |              | L4           |             | L5          |             | L6          |             |
|----------|--------------------|-------------|-------------|-------------|-------------|-------------|--------------|--------------|-------------|-------------|-------------|-------------|-------------|
|          |                    | Cilium      | Axon        | Cilium      | Axon        | Cilium      | Axon         | Cilium       | Axon        | Cilium      | Axon        | Cilium      | Axon        |
| IN Cilia | Interneurons       | 12.4 ± 0.93 | 6.8 ± 0.68  | 12.8 ± 0.92 | 6.85 ± 0.98 | 12.6 ± 0.77 | 14.4 ± 1.31  | 11.9 ± 0.69  | 12.4 ± 0.83 | 9 ± 0.60    | 10.6 ± 0.98 | 10.3 ± 1.73 | 7.9 ± 1.4   |
|          | Projection neurons | 17 ± 0.92   | 18.2 ± 1.83 | 21.5 ± 1.07 | 22.9 ± 2.01 | 19.6 ± 1.12 | 21.15 ± 1.73 | 17.6 ± 0.95  | 18.8 ± 1.09 | 15.6 ± 0.91 | 17.3 ± 1.01 | 15.9 ± 2.14 | 20 ± 3.7    |
|          | Astrocytes         | 2.40 ± 0.17 | 1.65 ± 0.22 | 1.79 ± 0.11 | 1.25 ± 0.19 | 1.71 ± 0.09 | 1.95 ± 0.34  | 2.07 ± 0.12  | 1.7 ± 0.24  | 1.39 ± 0.09 | 1.5 ± 0.22  | 1.42 ± 0.25 | 1.14 ± 0.26 |
|          | Oligodendrocytes   | 0.08 ± 0.04 | 0.05 ± 0.05 | 0.02 ± 0.02 | 0           | 0.07 ± 0.03 | 0.02 ± 0.09  | 0.14 ± 0.05  | 0.2 ± 0.09  | 0.16 ± 0.05 | 0.1 ± 0.08  | 0.08 ± 0.08 | 0           |
|          | Microglia/OPCs     | 0.22 ± 0.07 | 0           | 0.19 ± 0.05 | 0.15 ± 0.08 | 0.05 ± 0.03 | 0.05 ± 0.05  | 0.12 ± 0.07  | 0           | 0.10 ± 0.04 | 0.15 ± 0.08 | 0.08 ± 0.08 | 0           |
|          | Blood vessels      | 0           | 0           | 0           | 0           | 0           | 0            | 0            | 0           | 0           | 0           | 0           | 0           |
|          | Undefined          | 7.42 ± 0.37 | 4.95 ± 0.31 | 7.73 ± 0.33 | 3.45 ± 0.36 | 9.58 ± 0.48 | 3.75 ± 0.34  | 11.50 ± 0.55 | 7.5 ± 0.72  | 10.0 ± 0.45 | 5.5 ± 0.39  | 10.3 ± 1.15 | 6.13 ± 0.61 |
| PN Cilia | Interneurons       |             |             | 4.33 ± 0.29 | 9.5 ± 0.8   | 6.24 ± 0.37 | 9.45 ± 0.77  | 6.96 ± 0.52  | 8.40 ± 0.99 | 5.50 ± 0.42 | 8.1 ± 0.57  | 5.42 ± 0.26 | 6.25 ± 0.46 |
|          | Projection neurons |             |             | 40.0 ± 1.38 | 21.6 ± 1.66 | 36.3 ± 1.42 | 19.5 ± 1.90  | 29.7 ± 1.44  | 17.2 ± 1.38 | 24.8 ± 1.19 | 18 ± 1.79   | 19.4 ± 0.87 | 14.1 ± 1.27 |
|          | Astrocytes         |             |             | 2.49 ± 0.13 | 1.6 ± 0.23  | 2.27 ± 0.14 | 1.65 ± 0.27  | 2.58 ± 0.16  | 1.55 ± 0.25 | 1.78 ± 0.12 | 1.35 ± 0.22 | 1.63 ± 0.08 | 0.65 ± 0.15 |
|          | Oligodendrocytes   |             |             | 0.11 ± 0.04 | 0.05 ± 0.06 | 0.13 ± 0.05 | 0.05 ± 0.05  | 0.14 ± 0.06  | 0.2 ± 0.09  | 0.18 ± 0.07 | 0.05 ± 0.06 | 0.17 ± 0.05 | 0.3 ± 0.11  |
|          | Microglia/OPCs     |             |             | 0.18 ± 0.05 | 0.05 ± 0.06 | 0.18 ± 0.06 | 0.15 ± 0.08  | 0.04 ± 0.03  | 0.05 ± 0.06 | 0.14 ± 0.05 | 0.05 ± 0.08 | 0.10 ± 0.03 | 0.1 ± 0.08  |
|          | Blood vessels      |             |             | 0           | 0           | 0           | 0            | 0            | 0           | 0           | 0           | 0           | 0           |
|          | Undefined          |             |             | 9.91 ± 0.43 | 5.25 ± 0.3  | 8.89 ± 0.41 | 5.10 ± 0.36  | 8.88 ± 0.40  | 6.50 ± 0.41 | 12.1 ± 0.55 | 6.90 ± 0.54 | 12.0 ± 0.40 | 6.95 ± 0.85 |

Two-way ANOVA (cell types, IN<sub>cilia</sub> versus IN<sub>axon</sub>): L1 (p=1.9E<sup>-4</sup>), L2 (p=1.74E<sup>-4</sup>), L3 (p=1.5E<sup>-4</sup>), L4 (p=2E<sup>-5</sup>), L5 (p=1.6E<sup>-4</sup>), L6 (p=5.1E<sup>-4</sup>).

Two-way ANOVA (cell types, PN<sub>cilia</sub> versus PN<sub>axon</sub>): L2 (p=9.7E<sup>-3</sup>), L3 (p=1E<sup>-2</sup>), L4 (p=4.6E<sup>-3</sup>), L5 (p=7.2E<sup>-4</sup>), L6 (p=5.6E<sup>-4</sup>).

**Supplemental Table 5. Comparison of the average number of contacts (cell domains) made by a neuronal cilium (IN or PN) and an adjacent axonal segment of similar size** (Related to Figures 5, 6, and S4). IN, interneuron; PN, projection neuron. L1-L6, cortical layers. Data shown are mean  $\pm$  SEM.

**Table 5**

| Cell Domains | L1                        |             | L2          |             | L3          |             | L4          |             | L5          |             | L6          |             |             |
|--------------|---------------------------|-------------|-------------|-------------|-------------|-------------|-------------|-------------|-------------|-------------|-------------|-------------|-------------|
|              | Cilium                    | Axon        | Cilium      | Axon        | Cilium      | Axon        | Cilium      | Axon        | Cilium      | Axon        | Cilium      | Axon        |             |
| IN Cilia     | Inhibitory axons          | 12.0 ± 1.09 | 6.1 ± 0.81  | 12.5 ± 1.01 | 6.4 ± 1     | 12.5 ± 0.96 | 13.8 ± 1.75 | 11.6 ± 0.89 | 11.9 ± 1.45 | 8.75 ± 0.72 | 10 ± 1.29   | 10.3 ± 1.94 | 7.7 ± 1.80  |
|              | Excitatory axons          | 14.2 ± 1.17 | 15.8 ± 2.1  | 18.7 ± 1.33 | 20.2 ± 2.58 | 17.4 ± 1.32 | 18.3 ± 2.33 | 16.1 ± 1.19 | 17.4 ± 2.04 | 14.5 ± 1.13 | 16 ± 1.90   | 14.8 ± 2.52 | 18.9 ± 4.31 |
|              | Inhibitory dendrites      | 0.44 ± 0.10 | 0.70 ± 0.15 | 0.25 ± 0.07 | 0.45 ± 0.14 | 0.25 ± 0.07 | 0.3 ± 0.15  | 0.25 ± 0.06 | 0.25 ± 0.09 | 0.24 ± 0.07 | 0.6 ± 0.17  | 0           | 0.14 ± 0.14 |
|              | Excitatory dendrites      | 2.86 ± 0.26 | 2.45 ± 0.45 | 2.75 ± 0.23 | 2.65 ± 0.46 | 2.15 ± 0.20 | 2.25 ± 0.39 | 1.49 ± 0.17 | 1.35 ± 0.23 | 1.08 ± 0.17 | 1.15 ± 0.22 | 1.17 ± 0.32 | 1 ± 0.38    |
|              | Cilia                     | 0           | 0           | 0           | 0           | 0           | 0           | 0           | 0           | 0           | 0           | 0           | 0           |
|              | AIS                       | 0           | 0           | 0           | 0           | 0           | 0           | 0           | 0           | 0           | 0           | 0           | 0           |
|              | Soma                      | 0           | 0           | 0.02 ± 0.02 | 0           | 0.05 ± 0.03 | 0.05 ± 0.05 | 0           | 0           | 0.02 ± 0.02 | 0           | 0           | 0.14 ± 0.38 |
|              | Astrocyte processes       | 2.40 ± 0.17 | 1.65 ± 0.22 | 1.79 ± 0.11 | 1.25 ± 0.19 | 1.71 ± 0.09 | 1.95 ± 0.34 | 2.07 ± 0.12 | 1.7 ± 0.24  | 1.39 ± 0.09 | 1.5 ± 0.22  | 1.42 ± 0.25 | 1.14 ± 0.26 |
|              | Oligodendrocyte processes | 0.08 ± 0.04 | 0.05 ± 0.05 | 0.02 ± 0.02 | 0           | 0.07 ± 0.03 | 0.20 ± 0.09 | 0.14 ± 0.05 | 0.2 ± 0.09  | 0.16 ± 0.05 | 0.1 ± 0.08  | 0.08 ± 0.08 | 0           |
|              | Microglia/OPC processes   | 0.22 ± 0.07 | 0           | 0.19 ± 0.05 | 0.15 ± 0.08 | 0.05 ± 0.03 | 0.05 ± 0.05 | 0.12 ± 0.07 | 0           | 0.10 ± 0.04 | 0.15 ± 0.08 | 0.08 ± 0.08 | 0           |
|              | Undefined                 | 7.42 ± 0.37 | 4.95 ± 0.31 | 7.73 ± 0.33 | 3.45 ± 0.36 | 9.58 ± 0.48 | 3.75 ± 0.34 | 11.5 ± 0.55 | 7.55 ± 0.72 | 10.0 ± 0.45 | 5.5 ± 0.39  | 10.3 ± 1.15 | 6.13 ± 0.61 |
| PN Cilia     | Inhibitory axons          |             |             | 3.96 ± 0.34 | 9.15 ± 1.18 | 6.04 ± 0.47 | 9.05 ± 1.15 | 6.72 ± 0.59 | 8.35 ± 1.13 | 5.06 ± 0.46 | 7.65 ± 0.51 | 5.27 ± 0.32 | 6.20 ± 0.75 |
|              | Excitatory axons          |             |             | 36.4 ± 2.61 | 18.8 ± 2.37 | 34.0 ± 2.47 | 17.9 ± 2.35 | 28.2 ± 2.17 | 15.4 ± 1.88 | 23.5 ± 1.82 | 16.9 ± 2.21 | 18.1 ± 1.06 | 12.9 ± 1.67 |
|              | Inhibitory dendrites      |             |             | 0.36 ± 0.08 | 0.4 ± 0.11  | 0.20 ± 0.07 | 0.4 ± 0.11  | 0.24 ± 0.07 | 0.55 ± 0.17 | 0.44 ± 0.08 | 0.40 ± 0.12 | 0.15 ± 0.04 | 0.05 ± 0.07 |
|              | Excitatory dendrites      |             |             | 3.56 ± 0.30 | 2.8 ± 0.37  | 2.31 ± 0.23 | 1.65 ± 0.35 | 1.54 ± 0.23 | 1.75 ± 0.32 | 1.28 ± 0.16 | 1 ± 0.26    | 1.33 ± 0.13 | 1.1 ± 0.02  |
|              | Cilia                     |             |             | 0           | 0           | 0           | 0           | 0           | 0           | 0           | 0           | 0           | 0           |
|              | AIS                       |             |             | 0           | 0           | 0           | 0           | 0           | 0           | 0           | 0           | 0           | 0           |
|              | Soma                      |             |             | 0           | 0           | 0           | 0           | 0           | 0           | 0           | 0           | 0           | 0           |
|              | Astrocyte processes       |             |             | 2.49 ± 0.13 | 1.6 ± 0.23  | 2.27 ± 0.14 | 1.65 ± 0.27 | 2.58 ± 0.16 | 1.55 ± 0.25 | 1.78 ± 0.12 | 1.35 ± 0.22 | 1.63 ± 0.08 | 0.65 ± 0.15 |
|              | Oligodendrocyte processes |             |             | 0.11 ± 0.04 | 0.05 ± 0.06 | 0.13 ± 0.05 | 0.05 ± 0.05 | 0.14 ± 0.06 | 0.2 ± 0.09  | 0.18 ± 0.07 | 0.05 ± 0.06 | 0.17 ± 0.05 | 0.3 ± 0.11  |
|              | Microglia/OPC processes   |             |             | 0.18 ± 0.05 | 0.05 ± 0.06 | 0.18 ± 0.06 | 0.15 ± 0.08 | 0.04 ± 0.03 | 0.05 ± 0.06 | 0.14 ± 0.05 | 0.05 ± 0.08 | 0.10 ± 0.03 | 0.1 ± 0.08  |
|              | Undefined                 |             |             | 9.91 ± 0.43 | 5.25 ± 0.30 | 8.89 ± 0.41 | 5.10 ± 0.36 | 8.88 ± 0.40 | 6.50 ± 0.41 | 12.1 ± 0.55 | 6.90 ± 0.54 | 12.0 ± 0.40 | 6.95 ± 0.85 |

Two-way ANOVA (cell domains, IN<sub>cilia</sub> versus IN<sub>axon</sub>): L1 ( $p=7.6E^{-7}$ ), L2 ( $p=4.4E^{-6}$ ), L3 ( $p=7.61E^{-7}$ ), L4 ( $p=2.6E^{-7}$ ), L5 ( $p=6.3E^{-7}$ ), L6 ( $p=3.3E^{-6}$ ).

Two-way ANOVA (cell domains, PN<sub>cilia</sub> versus PN<sub>axon</sub>): L2 ( $p=1E^{-3}$ ), L3 ( $p=7E^{-4}$ ), L4 ( $p=1E^{-4}$ ), L5 ( $p=1.3E^{-5}$ ), L6 ( $p=1.2E^{-5}$ ).

**Supplemental Table 6. Construction of control axon segment contactome** (Related to Figures 5, 6, and S4). Neuronal cell identity numbers with links to electron micrographs and 3D images showing all the contacting cells of the neuronal cilia and respective control axon segments.

Table 6. Control Axon Segment Contactome of Neurons with Primary Cilia

| Interneurons with Primary Cilia |                                         |                           |                                         |                           |                                         |                           |                                         |                           |                                         |                           |                                         | Projection Neurons with Primary Cilia |                                         |                           |                                         |                           |                                         |                           |                                         |                           |                                         |  |  |
|---------------------------------|-----------------------------------------|---------------------------|-----------------------------------------|---------------------------|-----------------------------------------|---------------------------|-----------------------------------------|---------------------------|-----------------------------------------|---------------------------|-----------------------------------------|---------------------------------------|-----------------------------------------|---------------------------|-----------------------------------------|---------------------------|-----------------------------------------|---------------------------|-----------------------------------------|---------------------------|-----------------------------------------|--|--|
| Layer 1                         |                                         | Layer 2                   |                                         | Layer 3                   |                                         | Layer 4                   |                                         | Layer 5                   |                                         | Layer 6                   |                                         | Layer 2                               |                                         | Layer 3                   |                                         | Layer 4                   |                                         | Layer 5                   |                                         | Layer 6                   |                                         |  |  |
| Neuronal Cilia Contactome       | Corresponding Control Axonal Contactome | Neuronal Cilia Contactome | Corresponding Control Axonal Contactome | Neuronal Cilia Contactome | Corresponding Control Axonal Contactome | Neuronal Cilia Contactome | Corresponding Control Axonal Contactome | Neuronal Cilia Contactome | Corresponding Control Axonal Contactome | Neuronal Cilia Contactome | Corresponding Control Axonal Contactome | Neuronal Cilia Contactome             | Corresponding Control Axonal Contactome | Neuronal Cilia Contactome | Corresponding Control Axonal Contactome | Neuronal Cilia Contactome | Corresponding Control Axonal Contactome | Neuronal Cilia Contactome | Corresponding Control Axonal Contactome | Neuronal Cilia Contactome | Corresponding Control Axonal Contactome |  |  |
| 63644441                        | 927861587                               | 36882405719               | 36984275898                             | 5339538535                | 60207206204                             | 6190800710                | 22379395509                             | 419804933                 | 36848524616                             | 42350764963               | 85387206542                             | 27687130272                           | 62784778482                             | 3564139721                | 3488923980                              | 29193343834               | 37505269371                             | 3222459187                | 21753782929                             | 33882215763               | 8622978280                              |  |  |
| 3694245982                      | 37116889888                             | 30242620112               | 3814052253                              | 38558048234               | 28167782735                             | 56268367905               | 73650325871                             | 7039241083                | 51249517593                             | 33510086708               | 77593801988                             | 1435076143                            | 37537802228                             | 3924959007                | 28474858273                             | 6884952854                | 6852977332                              | 46916297984               | 57054161102                             | 4128741829                | 8015424244                              |  |  |
| 49243412                        | 46388145                                | 30148798118               | 30148798118                             | 4858599202                | 5018241852                              | 348788927                 | 1192292786                              | 3123344107                | 4926800074                              | 4472678418                | 448989489                               | 260207243                             | 2385871711                              | 326800875                 | 3873891128                              | 4913528881                | 4034358823                              | 6918808508                | 653300838                               | 460127284                 | 4083811748                              |  |  |
| 382741391                       | 387001486                               | 682003018                 | 759888259                               | 39428921809               | 39283597458                             | 4879722794                | 13632580397                             | 616551025                 | 8470903224                              | 5492602881                | 587056584                               | 105861588                             | 37684014334                             | 5425833923                | 97381387053                             | 5075322223                | 67714167800                             | 4094208392                | 39482973037                             | 5348317139                | 597208180                               |  |  |
| 3714614210                      | 4601972164                              | 1130279365                | 1712478325                              | 3882946653                | 40283888070                             | 4748145379                | 66445959030                             | 68209284906               | 60177103295                             | 50665564778               | 1728497220                              | 11539292644                           | 4554116068                              | 24205968154               | 2030050661                              | 3266770115                | 3120073110                              | 39266741389               | 478974368                               | 6948900165                |                                         |  |  |
| 1384181353                      | 1510737464                              | 2324832486                | 2495326947                              | 5177867272                | 40618009186                             | 5226472246                | 40680419421                             | 24924043058               | 24203036262                             | 7401757286                | 7372700250                              | 3518681641                            | 5688667201                              | 3167438882                | 36887162227                             | 3180420219                | 20881888351                             | 3003613823                | 74128035368                             | 514786688                 | 7568861697                              |  |  |
| 5005850706                      | 4978912407                              | 2703113569                | 2543086577                              | 4902169919                | 5338754203                              | 5612478783                | 41962574370                             | 3658558300                | 127227863117                            | 39962851803               | 39948294623                             | 31557144036                           | 58250026737                             | 3852445041                | 48816687884                             | 3254783068                | 39166716492                             | 44150200654               | 72460032051                             | 5300718424                | 40720570468                             |  |  |
| 2403480204                      | 3112112427                              | 2907424570                | 3109513309                              | 29383398617               | 36262972468                             | 2713962340                | 2873962120                              | 33671281270               | 46312543560                             | 6870362443                | 8064933300                              | 36138924931                           | 52813962022                             | 4289131873                | 73356200812                             | 395937770                 | 30128840918                             | 2422499187                | 4358343003                              | 6410715317                | 3540724373                              |  |  |
| 3156431007                      | 3221180394                              | 5731360521                | 5835302026                              | 4381422306                | 478984793                               | 2844818353                | 2023103857                              | 3498114218                | 3281564818                              | 3111531808                | 2120274399                              | 249888839                             | 4729105528                              | 4753414558                | 485344413                               | 4241562819                | 3903842802                              | 621220281                 | 9497411185                              |                           |                                         |  |  |
| 3301154728                      | 3318195486                              | 3778707036                | 47277922631                             | 41995120012               | 58783878894                             | 3868563836                | 4681478068                              | 3881078930                | 4211221884                              | 3485898079                | 11903071975                             | 248806388                             | 37918242001                             | 5881860808                | 5038103435                              | 4853848888                | 5451240280                              | 685498688                 | 1642731760                              | 41828114513               |                                         |  |  |
| 3113022318                      | 2638321430                              | 1449783370                | 10140595358                             | 3515979248                | 12352139808                             | 32781599134               | 49588901770                             | 6265886819                | 41247315456                             | 3460232810                | 66314376370                             | 4930830982                            | 67234927825                             | 5631875589                | 41729513545                             | 627899933                 | 49501785138                             | 32874985927               | 42641504274                             |                           |                                         |  |  |
| 1423658872                      | 10216043355                             | 2703113569                | 2338842361                              | 2031180024                | 2438441389                              | 5453255395                | 49547197677                             | 4630670085                | 4851037454                              | 30538005084               | 68824710848                             | 4930830982                            | 40421488213                             | 4695405084                | 4787115100                              | 6907808318                | 69214202042                             | 6981968873                | 7817944808                              |                           |                                         |  |  |
| 2137208420                      | 2093381678                              | 3638989493                | 3695414460                              | 5081116204                | 39786872092                             | 29229390372               | 38189092099                             | 4139328980                | 4401356111                              | 36533001596               | 49937813387                             | 4300758083                            | 13984847568                             | 4753414558                | 31349389866                             | 3443888258                | 83879871576                             | 5273488042                | 40735520846                             |                           |                                         |  |  |
| 438614835                       | 13632007995                             | 3074982949                | 3990628894                              | 29835261818               | 81726399211                             | 31981127884               | 4862737864                              | 41962636648               | 59355321555                             | 31978362248               | 64895978841                             | 2761374918                            | 3589132418                              | 6847591453                | 33993188475                             | 6926849845                | 926441162                               | 6926849845                | 926441162                               | 4118190288                |                                         |  |  |
| 3190245838                      | 4902773433                              | 4021826373                | 8685973845                              | 41819520989               | 42058215808                             | 3958888451                | 4910780827                              | 8079110598                | 15977403010                             | 37224848178               | 5438045411                              | 6068888332                            | 278857288                               | 1183858266                | 651388803                               | 4282373553                | 811918951                               | 248852283                 | 248852283                               |                           |                                         |  |  |
| 440589895                       | 440589895                               | 2718683848                | 2849787824                              | 3858571587                | 38800314583                             | 3531238060                | 4142138134                              | 4300839678                | 454784732                               | 3489218998                | 47321389716                             | 852830461                             | 185204530                               | 5860380217                | 6020184795                              | 6077189826                | 4153800549                              | 6871080167                | 7307327181                              |                           |                                         |  |  |
| 1452686296                      | 1050742020                              | 2338930806                | 2900515439                              | 4275786135                | 4653996159                              | 42225984927               | 5130978442                              | 4561571428                | 4634256070                              | 183140680                 | 14934020036                             | 4408450407                            | 7448380841                              | 33170917865               | 61804483928                             | 4639724073                | 5187005454                              | 5012275127                | 5407711888                              |                           |                                         |  |  |
| 847208032                       | 5442482784                              | 5384428784                | 5349009135                              | 5687893989                | 5877078075                              | 3091316578                | 86418387804                             | 6117131430                | 7898588680                              | 2857118678                | 74893955177                             | 3617950418                            | 48121859783                             | 3208569782                | 6851702549                              | 5917884171                | 6389178677                              | 6904345874                | 59938711502                             |                           |                                         |  |  |
| 2002856933                      | 1918385834                              | 4561277589                | 3680745828                              | 4930116877                | 46344467409                             | 3807269209                | 27468813662                             | 33737933643               | 447863001284                            | 4845841742                | 89224739227                             | 6067314832                            | 80175608232                             | 5117388943                | 68662390277                             | 37465511009               | 4124844440                              | 6381792486                | 6617821436                              |                           |                                         |  |  |
| 3853411748                      | 3863633832                              | 589382258                 | 6382917885                              | 41844462421               | 59348173803                             | 64476883011               | 73412977888                             | 3814600118                | 41872058181                             | 2955833075                | 63784519447                             | 5688131184                            | 8404219583                              | 601246668                 | 6244279888                              | 4054802495                | 69608010903                             | 3877568378                | 13541882823                             |                           |                                         |  |  |

**Supplemental Table 7. Construction of AIS contactome** (Related to Figures 5, 6, and S4). Neuronal cell identity numbers with links to electron micrographs and 3D images showing all the contacting cells of the neuronal cilia and respective AIS.



**Table 7. Control Axon Initial Segment (AIS) Contactome of Neurons with Primary Cilia**

| Interneurons with Primary Cilia |                                      | Projection Neurons with Primary Cilia |                                      |
|---------------------------------|--------------------------------------|---------------------------------------|--------------------------------------|
| Layer 1                         |                                      | Layer 6                               |                                      |
| Neuronal Cilia Contactome       | Corresponding Control AIS Contactome | Neuronal Cilia Contactome             | Corresponding Control AIS Contactome |
| <a href="#">460458122</a>       | <a href="#">460458122</a>            | <a href="#">6904345674</a>            | <a href="#">6904345674</a>           |
| <a href="#">1190245536</a>      | <a href="#">1190245536</a>           | <a href="#">5726746103</a>            | <a href="#">5726746103</a>           |
| <a href="#">1423553872</a>      | <a href="#">1423553872</a>           | <a href="#">5055406469</a>            | <a href="#">5055406469</a>           |
| <a href="#">1613060545</a>      | <a href="#">1613060545</a>           | <a href="#">31460631882</a>           | <a href="#">31460631882</a>          |
| <a href="#">1787105373</a>      | <a href="#">1787105373</a>           | <a href="#">33953035801</a>           | <a href="#">33953035801</a>          |
| <a href="#">3301154728</a>      | <a href="#">3301154728</a>           | <a href="#">5216747637</a>            | <a href="#">5216747637</a>           |
| <a href="#">4627598544</a>      | <a href="#">4627598544</a>           | <a href="#">33866524935</a>           | <a href="#">33866524935</a>          |
| <a href="#">3113022318</a>      | <a href="#">3113022318</a>           | <a href="#">7079616124</a>            | <a href="#">7079616124</a>           |
| <a href="#">1263103927</a>      | <a href="#">1263103927</a>           | <a href="#">6730784873</a>            | <a href="#">6730784873</a>           |
| <a href="#">1730029758</a>      | <a href="#">1730029758</a>           | <a href="#">6718066168</a>            | <a href="#">6718066168</a>           |

**Supplemental Table 8. (A) Comparison of the average number of contacts (cell types) made by the neuronal cilia (interneuronal [L1] or projection neuronal [L6]) and the AIS of the respective neurons. Data shown are mean  $\pm$  SEM. (B) Comparison of the average number of contacts (cell domains) made by the neuronal cilia (interneuronal [L1] or projection neuronal [L6]) and the AIS of the respective neurons. Data shown are mean  $\pm$  SEM. (Related to Figures 5, 6, and S4).**

**Table 8****A**

| Cell Types         | L1 (IN)     |             | L6 (PN)     |             |
|--------------------|-------------|-------------|-------------|-------------|
|                    | Cilium      | AIS         | Cilium      | AIS         |
| Interneurons       | 12.4 ± 0.93 | 21.5 ± 3.18 | 5.42 ± 0.26 | 15.2 ± 1.5  |
| Projection neurons | 17.0 ± 0.92 | 26.5 ± 4.9  | 19.4 ± 0.87 | 17.2 ± 1.9  |
| Astrocytes         | 2.40 ± 0.17 | 4.7 ± 0.34  | 1.63 ± 0.08 | 2.7 ± 0.31  |
| Oligodendrocytes   | 0.08 ± 0.04 | 0.2 ± 0.13  | 0.17 ± 0.05 | 0.2 ± 0.13  |
| Microglia/OPCs     | 0.22 ± 0.07 | 0.2 ± 0.13  | 0.10 ± 0.03 | 0.1 ± 0.1   |
| Blood vessels      | 0           | 0           | 0           | 0           |
| Undefined          | 7.42 ± 0.37 | 9.7 ± 0.68  | 12.0 ± 0.40 | 12.4 ± 1.27 |

Two-way ANOVA (cell types, IN<sub>cilia</sub> versus IN<sub>AIS</sub>):  $F_{1,412} = 30.97$ ,  $p = 4.7E^{-8}$

Two-way ANOVA (cell types, PN<sub>cilia</sub> versus PN<sub>AIS</sub>):  $F_{1,755} = 7.214$ ,  $p = 0.0074$

**B**

| Cell Domains              | L1 (IN)     |             | L6 (PN)     |             |
|---------------------------|-------------|-------------|-------------|-------------|
|                           | Cilium      | AIS         | Cilium      | AIS         |
| Inhibitory axons          | 12.0 ± 1.09 | 20.8 ± 3.88 | 5.27 ± 0.32 | 14.9 ± 2.01 |
| Excitatory axons          | 14.2 ± 1.17 | 22 ± 4.57   | 18.1 ± 1.06 | 14 ± 1.95   |
| Inhibitory dendrites      | 0.44 ± 0.10 | 0.6 ± 0.3   | 0.15 ± 0.04 | 0.3 ± 0.15  |
| Excitatory dendrites      | 2.86 ± 0.26 | 4.5 ± 0.86  | 1.33 ± 0.13 | 3.2 ± 0.76  |
| Cilia                     | 0           | 0           | 0           | 0           |
| AIS                       | 0           | 0           | 0           | 0           |
| Soma                      | 0           | 0           | 0           | 0           |
| Astrocyte processes       | 2.4 ± 0.17  | 4.7 ± 0.34  | 1.63 ± 0.08 | 2.7 ± 0.31  |
| Oligodendrocyte processes | 0.08 ± 0.04 | 0.2 ± 0.13  | 0.17 ± 0.05 | 0.2 ± 0.13  |
| Microglia/OPC processes   | 0.22 ± 0.07 | 0.2 ± 0.13  | 0.10 ± 0.03 | 0.1 ± 0.1   |
| Undefined cells           | 7.42 ± 0.37 | 9.7 ± 0.68  | 12.0 ± 0.40 | 12.4 ± 0.87 |

Two-way ANOVA (cell domains, IN<sub>cilia</sub> versus IN<sub>AIS</sub>):  $F_{1,648} = 23.57$ ,  $p = 1.5E^{-6}$

Two-way ANOVA (cell domains, PN<sub>cilia</sub> versus PN<sub>AIS</sub>):  $F_{1,1187} = 5.078$ ,  $p = 0.024$

**Supplemental Table 9. (A) The average number of contacts (cell types) made by an astrocyte cilium in different cortical layers. (B) The average number of contacts (cell domains) made by an astrocyte cilium in different cortical layers. L1-L6, cortical layers. Data shown are mean  $\pm$  SEM. (Related to Figure 7).**

**Table 9. Contacts (cell types, cell domains) made by an astrocyte cilium in different cortical layers**

**A**

| Cell Types      |                    | L1          | L2          | L3          | L4          | L5          | L6          |
|-----------------|--------------------|-------------|-------------|-------------|-------------|-------------|-------------|
| Astrocyte Cilia | Interneurons       | 1.89 ± 0.29 | 1.16 ± 0.30 | 1.55 ± 0.41 | 1.03 ± 0.20 | 1.55 ± 0.33 | 2.17 ± 0.52 |
|                 | Projection neurons | 5.00 ± 0.61 | 2.69 ± 0.51 | 3.00 ± 0.63 | 2.74 ± 0.44 | 3.71 ± 0.52 | 3.72 ± 0.47 |
|                 | Astrocytes         | 0.29 ± 0.08 | 0.28 ± 0.08 | 0.30 ± 0.08 | 0.31 ± 0.08 | 0.13 ± 0.06 | 0.22 ± 0.07 |
|                 | Oligodendrocytes   | 0.03 ± 0.03 | 0           | 0.03 ± 0.03 | 0.03 ± 0.03 | 0           | 0.06 ± 0.04 |
|                 | Microglia/OPCs     | 0.08 ± 0.04 | 0           | 0           | 0           | 0           | 0           |
|                 | Blood vessels      | 0           | 0           | 0           | 0           | 0           | 0           |
|                 | Undefined          | 2.63 ± 0.23 | 2.03 ± 0.23 | 1.52 ± 0.15 | 1.71 ± 0.20 | 2.77 ± 0.27 | 2.14 ± 0.19 |

Two-way ANOVA (cell types, Astrocyte<sub>cilia</sub> versus IN<sub>cilia</sub>):  $F_{1,76} = 54.75$ ,  $p = 1.5E^{-10}$

Two-way ANOVA (cell types, Astrocyte<sub>cilia</sub> versus PN<sub>cilia</sub>):  $F_{1,69} = 24.93$ ,  $p = 4.5E^{-6}$

**B**

| Cell Domains    |                           | L1          | L2          | L3          | L4          | L5          | L6          |
|-----------------|---------------------------|-------------|-------------|-------------|-------------|-------------|-------------|
| Astrocyte Cilia | Inhibitory axons          | 1.74 ± 0.24 | 1.09 ± 0.22 | 1.55 ± 0.32 | 1.03 ± 0.17 | 1.52 ± 0.27 | 2.08 ± 0.41 |
|                 | Excitatory axons          | 4.03 ± 0.48 | 2.31 ± 0.40 | 2.58 ± 0.46 | 2.54 ± 0.35 | 3.45 ± 0.46 | 3.33 ± 0.40 |
|                 | Inhibitory dendrites      | 0.16 ± 0.06 | 0.06 ± 0.04 | 0           | 0           | 0.03 ± 0.03 | 0.08 ± 0.05 |
|                 | Excitatory dendrites      | 0.97 ± 0.19 | 0.34 ± 0.10 | 0.42 ± 0.11 | 0.17 ± 0.06 | 0.19 ± 0.07 | 0.39 ± 0.11 |
|                 | Cilia                     | 0           | 0           | 0           | 0           | 0           | 0           |
|                 | AIS                       | 0           | 0           | 0           | 0           | 0.03 ± 0.03 | 0           |
|                 | Soma                      | 0           | 0.03 ± 0.03 | 0           | 0.03 ± 0.03 | 0.03 ± 0.03 | 0           |
|                 | Astrocyte processes       | 0.29 ± 0.08 | 0.28 ± 0.08 | 0.30 ± 0.08 | 0.31 ± 0.08 | 0.13 ± 0.06 | 0.22 ± 0.07 |
|                 | Oligodendrocyte processes | 0.03 ± 0.03 | 0           | 0.03 ± 0.03 | 0.03 ± 0.03 | 0           | 0.06 ± 0.04 |
|                 | Microglia/OPC processes   | 0.08 ± 0.04 | 0           | 0           | 0           | 0           | 0           |
|                 | Undefined cells           | 2.63 ± 0.23 | 2.03 ± 0.23 | 1.52 ± 0.15 | 1.71 ± 0.20 | 2.77 ± 0.27 | 2.14 ± 0.19 |

Two-way ANOVA (cell domains, Astrocyte<sub>cilia</sub> versus IN<sub>cilia</sub>):  $F_{1,120} = 51.95$ ,  $p = 5.5E^{-11}$

Two-way ANOVA (cell domains, Astrocyte<sub>cilia</sub> versus PN<sub>cilia</sub>):  $F_{1,109} = 25.48$ ,  $p = 1.8E^{-6}$
